# Supplementary material for: Holocentric chromosomes: convergent evolution, meiotic adaptations, and genomic analysis
Source: Springer Nature journal article supplement (doi:10.1007/s10577-012-9292-1), 2012-07-01
Supplement: MOESM1 [file 10577_2012_9292_MOESM1_ESM.pdf]

Scientific name

Common name

Reference

*Italic* are species with holocentric chromosomes with weak supporting data

Plant (Cyperaceae, Juncaceae, Chionographideae, Drosereae, Cuscutaeae)

**Cyperaceae**

|                                           |                        |                            |
|-------------------------------------------|------------------------|----------------------------|
| Rhychospora tenuis (2n=4)                 | Quill beaksedge        | (Vanzela, 1996)            |
| Rhychospora rosemariana (2n=50)           | Sedge                  | (Luceño et al., 1998)      |
| Rhychospora ciliate (2n=10)               | Sedge                  | (Luceño et al., 1998)      |
| Rhychospora pubera (2n=10)                | Sedge                  | (Luceño et al., 1998)      |
| Rhychospora breviscula (2n=10)            | Sedge                  | (Luceño et al., 1998)      |
| Rhychospora corymbosa (2n=18)             | Sedge                  | (Luceño et al., 1998)      |
| Rhychospora gigantea (2n=18)              | Sedge                  | (Luceño et al., 1998)      |
| Rhychospora legrandii (2n=18)             | Sedge                  | (Luceño et al., 1998)      |
| Rhychospora scutellata (2n=18)            | Sedge                  | (Luceño et al., 1998)      |
| Rhychospora triflora (2n=18)              | Sedge                  | (Luceño et al., 1998)      |
| Rhychospora exaltata (2n=20)              | Sedge                  | (Luceño et al., 1998)      |
| Rhychospora glaziovii (2n=10)             | Sedge                  | (Luceño et al., 1998)      |
| Rhychospora holoschoenoides (2n=10-20)    | Sedge                  | (Luceño et al., 1998)      |
| Rhychospora globosa (2n=24-48)            | Sedge                  | (Luceño et al., 1998)      |
| Rhychospora armerioides (2n=10)           | Sedge                  | (Luceño et al., 1998)      |
| Rhychospora diamantine (2n=24)            | Sedge                  | (Luceño et al., 1998)      |
| Rhychospora riparai (2n=10)               | Sedge                  | (Vanzela and Guerra, 2000) |
| Rhychospora barbata (2n=10)               | Sedge                  | (Vanzela and Guerra, 2000) |
| Rhychospora nervosa (2n=20-30)            | Sedge                  | (Luceño et al., 1998)      |
| Rhychospora globosa (2n=36)               | Sedge                  | (Vanzela and Guerra, 2000) |
| Carex blanda                              | Eastern woodland sedge | (Brown and Lemmon, 2000)   |
| <i>Carex dioica</i> (2n=52)               |                        | (Heilborn, 1924)           |
| <i>Carex rupestris</i> (2n=50)            |                        | (Heilborn, 1924)           |
| <i>Carex intermedia</i> (2n=~60)          |                        | (Heilborn, 1924)           |
| <i>Carex contigua</i> (2n=~58)            |                        | (Heilborn, 1924)           |
| <i>Carex divulsa</i> (2n=58)              |                        | (Heilborn, 1924)           |
| <i>Carex vulpine</i> (2n=68)              |                        | (Heilborn, 1924)           |
| <i>Carex paradoxa</i> (2n=64)             |                        | (Heilborn, 1924)           |
| <i>Carex canescens</i> (2n=56)            |                        | (Heilborn, 1924)           |
| <i>Carex loliacea</i> (2n=54)             |                        | (Heilborn, 1924)           |
| <i>Carex elongate</i> (2n=~56)            |                        | (Heilborn, 1924)           |
| <i>Carex rigida</i> (2n=70)               |                        | (Heilborn, 1924)           |
| <i>Carex aquatilis</i> (2n=~74)           |                        | (Heilborn, 1924)           |
| <i>Carex Goodenoughii</i> (2n=84)         |                        | (Heilborn, 1924)           |
| <i>Carex Goodenoughii juncea</i> (2n=~84) |                        | (Heilborn, 1924)           |
| <i>Carex gracilis</i> (2n=84)             |                        | (Heilborn, 1924)           |
| <i>Carex caespitosa</i> (2n=80)           |                        | (Heilborn, 1924)           |
| <i>Carex Hudsonii</i> (2n=80)             |                        | (Heilborn, 1924)           |
| <i>Carex alpine</i> (2n=56)               |                        | (Heilborn, 1924)           |
| <i>Carex Buxbaumii</i> (2n=~74)           |                        | (Heilborn, 1924)           |
| <i>Carex atrata</i> (2n=54)               |                        | (Heilborn, 1924)           |
| <i>Carex glauca</i> (2n=76)               |                        | (Heilborn, 1924)           |
| <i>Carex pallescens</i> (2n=64)           |                        | (Heilborn, 1924)           |
| <i>Carex tomentosa</i> (2n=48)            |                        | (Heilborn, 1924)           |
| <i>Carex ericetorum</i> (2n=30)           |                        | (Heilborn, 1924)           |
| <i>Carex montana</i> (2n=38)              |                        | (Heilborn, 1924)           |
| <i>Carex pilulifera</i> (2n=18)           |                        | (Heilborn, 1924)           |
| <i>Carex caryophyllea</i> (2n=62)         |                        | (Heilborn, 1924)           |
| <i>Carex digitata</i> (2n=52)             |                        | (Heilborn, 1924)           |
| <i>Carex ornithopoda</i> (2n=~46)         |                        | (Heilborn, 1924)           |
| <i>Carex panacea</i> (2n=32)              |                        | (Heilborn, 1924)           |
| <i>Carex sparsiflora</i> (2n=32)          |                        | (Heilborn, 1924)           |
| <i>Carex capillaries</i> (2n=54)          |                        | (Heilborn, 1924)           |
| <i>Carex punctata</i> (2n=68)             |                        | (Heilborn, 1924)           |
| <i>Carex distans</i> (2n=72)              |                        | (Heilborn, 1924)           |
| <i>Carex Hornschuchiana</i> (2n=56)       |                        | (Heilborn, 1924)           |
| <i>Carex Oederi</i> (2n=70)               |                        | (Heilborn, 1924)           |

| Scientific name                                    | Common name        | Reference                        |
|----------------------------------------------------|--------------------|----------------------------------|
| <i>Carex lepidocarpa</i> (2n=68)                   |                    | (Heilborn, 1924)                 |
| <i>Carex pseudo-cyperus</i> (2n=66)                |                    | (Heilborn, 1924)                 |
| <i>Carex Grayi</i> (2n=52)                         |                    | (Heilborn, 1924)                 |
| <i>Carex rostrata</i> (2n=76)                      |                    | (Heilborn, 1924)                 |
| <i>Carex vesicaria</i> (2n=82)                     |                    | (Heilborn, 1924)                 |
| <i>Carex riparia</i> (2n=72)                       |                    | (Heilborn, 1924)                 |
| <i>Carex hirta</i> (2n=112)                        |                    | (Heilborn, 1924)                 |
| <i>Carex</i> - 107 species                         |                    | (Wahl, 1940)                     |
| <i>Fimbristylis umbellaris</i> (2n=6)              | Sedge              | (Prasad Rath and Patnaik, 1977)  |
| <b>Juncaceae</b>                                   |                    |                                  |
| <i>Luzula nivea</i> (2n=8-24)                      | Snowy woodrush     | (Kuta et al., 2004)              |
| <i>Luzula flaccida</i>                             | Pale woodrush      | (Collet and Westerman, 1984)     |
| <i>Luzula luzuloides</i> (2n=8-24)                 | Oakforest woodrush | (Kuta et al., 2004)              |
| <i>Luzula pilosa</i>                               | Hairy woodrush     | (Kuta et al., 2004)              |
| <i>Luzula multiflora</i> (2n=12-84)                | Heath woodrush     | (Jarolímová and Kirschner, 1995) |
| <i>Luzula purpurea</i> (2n=6)                      | Woodrush           | (Ray and Venketeswaran, 1979)    |
| <i>Luzula luzuloides</i>                           | Woodrush           | (Madej, 1998)                    |
| <i>Eleocharis palustris</i> (2n=)                  | Common spikerush   | (Håkansson, 1954)                |
| <i>Eleocharis uniglumis</i> (2n=16)                | Spikerush          | (Battaglia, 1954)                |
| <i>Eleocharis palustris micrcarpa</i> (2n=8)       | Spikerush          | (Håkansson, 1958)                |
| <i>Eleocharis mamillata</i> (2n=8)                 | Spikerush          | (Håkansson, 1958)                |
| <i>Eleocharis mamillata</i> (2n=16)                | Spikerush          | (Hoshino, 1987)                  |
| <i>Eleocharis wichurae</i> (2n=20)                 | Spikerush          | (Hoshino, 1987)                  |
| <i>Eleocharis tetraquerta</i> (2n=20)              | Spikerush          | (Hoshino, 1987)                  |
| <i>Eleocharis acicularis</i> (2n=20)               | Spikerush          | (Hoshino, 1987)                  |
| <i>Eleocharis congesta</i> (2n=20)                 | Spikerush          | (Hoshino, 1987)                  |
| <i>Eleocharis kuroguwai</i> (2n=~196)              | Spikerush          | (Hoshino, 1987)                  |
| <i>Eleocharis subarticulata</i> (2n=6)             | Spikerush          | (Silva et al., 2005)             |
| <i>Eleocharis maculosa</i> (2n=6-8)                | Spikerush          | (Silva et al., 2008)             |
| <i>Juncus acutus acutus</i>                        |                    | (Snogerup, 1993)                 |
| <i>Juncus acutus leopoldii</i>                     |                    | (Snogerup, 1993)                 |
| <i>Juncus littoralis</i>                           |                    | (Snogerup, 1993)                 |
| <i>Juncus heldreichianus heldreichiansu</i>        |                    | (Snogerup, 1993)                 |
| <i>Juncus heldreichianus orientalis</i>            |                    | (Snogerup, 1993)                 |
| <i>Juncus maritimus</i>                            |                    | (Snogerup, 1993)                 |
| <i>Juncus rigidus</i>                              |                    | (Snogerup, 1993)                 |
| <i>Juncus socotranus</i>                           |                    | (Snogerup, 1993)                 |
| <i>Juncus roemerianus</i>                          |                    | (Snogerup, 1993)                 |
| <i>Juncus cooperi</i>                              |                    | (Snogerup, 1993)                 |
| <i>Juncus kraussii kraussii</i>                    |                    | (Snogerup, 1993)                 |
| <i>Juncus kraussii australiensis</i>               |                    | (Snogerup, 1993)                 |
| <i>Juncus kraussii austerus</i>                    |                    | (Snogerup, 1993)                 |
| <b>Liliales</b>                                    |                    |                                  |
| <i>Chionographis japonica</i> (2n=24)              |                    | (Tanaka and Tanaka, 1977)        |
| <i>Chionographis japonica kurohimensis</i> (2n=44) |                    | (Tanaka and Tanaka, 1979)        |
| <i>Chionographis japonica hisauchiana</i> (2n=42)  |                    | (Tanaka and Tanaka, 1979)        |
| <i>Chionographis koidzumiana</i> (2n=24)           |                    | (Tanaka and Tanaka, 1979)        |
| <b>Caryophyllales</b>                              |                    |                                  |
| <i>Drosera barbigera</i> (2n=10)                   | Sundew             | (Sheikh and Kondo, 1995)         |
| <i>Drosera dichrosepala</i> (2n=12)                | Sundew             | (Sheikh and Kondo, 1995)         |
| <i>Drosera echinoblasta</i> (2n=20)                | Sundew             | (Sheikh and Kondo, 1995)         |
| <i>Drosera falconeri</i> (2n=12)                   | Sundew             | (Sheikh and Kondo, 1995)         |
| <i>Drosera helodes</i> (2n=18)                     | Sundew             | (Sheikh and Kondo, 1995)         |
| <i>Drosera leioblasta</i> (2n=10)                  | Sundew             | (Sheikh and Kondo, 1995)         |
| <i>Drosera mannii</i> (2n=14)                      | Sundew             | (Sheikh and Kondo, 1995)         |
| <i>Drosera oreopodion</i> (2n=14)                  | Sundew             | (Sheikh and Kondo, 1995)         |
| <i>Drosera paleacae</i> (2n=10)                    | Sundew             | (Sheikh and Kondo, 1995)         |
| <i>Drosera roseana</i> (2n=6)                      | Sundew             | (Sheikh and Kondo, 1995)         |
| <i>Drosera sewellae</i> (2n=18)                    | Sundew             | (Sheikh and Kondo, 1995)         |
| <i>Drosera walyunga</i> (2n=16)                    | Sundew             | (Sheikh and Kondo, 1995)         |
| <b>Solanales</b>                                   |                    |                                  |
| <i>Cuscuta approximata</i>                         | Alphalpha dodder   | (Guerra and García, 2004)        |

| Scientific name                             | Common name | Reference                 |
|---------------------------------------------|-------------|---------------------------|
| <i>Cuscuta grammica</i>                     | Dodder      | (Pazy and Plitmann, 1991) |
| <i>Cuscuta monogyna</i> (2n=30)             | Dodder      | (Pazy and Plitmann, 1991) |
| <i>Cuscuta babylonica</i> (2n=8)            | Dodder      | (Pazy and Plitmann, 1994) |
| <i>Cuscuta cuscuta</i> (2n=18)              | Dodder      | (García, 2001)            |
| <i>Cuscuta planiflora</i> (2n=34)           | Dodder      | (García, 2001)            |
| <i>Cuscuta planiflora papillosa</i> (2n=20) | Dodder      | (García, 2001)            |
| <i>Cuscuta nivea</i> (2n=18)                | Dodder      | (García, 2001)            |

## Algae (Desmidioides)

|                                    |             |                 |
|------------------------------------|-------------|-----------------|
| <i>Spirogyra crassa</i>            | Green algae | (Godward, 1954) |
| <i>Spirogyra triformis</i>         | Green algae | (Godward, 1954) |
| <i>Spirogyra sub-echinata</i>      | Green algae | (Godward, 1954) |
| <i>Cosmarium botrytis</i> (2n=14)  | Green algae | (King, 1953)    |
| <i>Pleurotænum kallis</i> (2n=104) | Green algae | (King, 1953)    |

## Insect (Hemiptera, Odonata, Dermaptera, Lepidoptera, Trichoptera)

### Paraneoptera

#### Hemiptera

|                                         |                              |                                      |
|-----------------------------------------|------------------------------|--------------------------------------|
| <i>Corixa punctata</i> (2n=22)          | Lesser water boatman         | (Waller and Angus, 2005)             |
| <i>Corixa iberica</i> (2n=22)           | Water boatman                | (Waller and Angus, 2005)             |
| <i>Corixa dentipes</i> (2n=22)          | Water boatman                | (Waller and Angus, 2005)             |
| <i>Corixa panzeri</i> (2n=22)           | Water boatman                | (Waller and Angus, 2005)             |
| <i>Corixa affinis</i> (2n=22)           | Water boatman                | (Waller and Angus, 2005)             |
| <i>Gerris lateralis</i>                 | Water strider                | (Geitler, 1937)                      |
| <i>Gerris lacustris</i>                 | Common pond skater           | (Geitler, 1937)                      |
| <i>Antiteuchus mixtus</i> (2n=14)       | Stink bug                    | (Lanzone and Souza, 2006)            |
| <i>Antiteuchus sepulcralis</i> (2n=14)  | Stink bug                    | (Lanzone and Souza, 2006)            |
| <i>Antiteuchus macraspis</i> (2n=14)    | Stink bug                    | (Lanzone and Souza, 2006)            |
| <i>Thyanta perditor</i> (2n=14)         | Stink bug                    | (Schrader and Hughes-Schrader, 1956) |
| <i>Thyanta pseudocasta</i> (2n=14)      | Stink bug                    | (Schrader and Hughes-Schrader, 1956) |
| <i>Thyanta antiguensis</i> (2n=14)      | Stink bug                    | (Schrader and Hughes-Schrader, 1956) |
| <i>Thyanta pallidovirens</i> (2n=16)    | Stink bug                    | (Schrader and Hughes-Schrader, 1956) |
| <i>Thyanta custator</i> (2n=16)         | Red shoulderd stink bug      | (Schrader and Hughes-Schrader, 1956) |
| <i>Thyanta calceata</i> (2n=27)         | Stink bug                    | (Schrader and Hughes-Schrader, 1956) |
| <i>Euschistus servus</i> (2n=14)        |                              | (Hughes-Schrader and Schrader, 1961) |
| <i>Euschistus tristigmus</i> (2n=14)    |                              | (Hughes-Schrader and Schrader, 1961) |
| <i>Solubea pygnax</i> (2n=14)           |                              | (Hughes-Schrader and Schrader, 1961) |
| <i>Rhyditolomia senilis</i>             |                              | (Hughes-Schrader and Schrader, 1961) |
| <i>Rhyditolomia sinilis</i>             |                              | (Hughes-Schrader and Schrader, 1961) |
| <i>Bagrada picta</i>                    | Indian Pentatomid            | (Dutt, 1955)                         |
| <i>Oechalia pacific</i>                 | Hawaiian stink bug           | (Heizer, 1950)                       |
| <i>Oechalia patruelis</i>               |                              | (Heizer, 1950)                       |
| <i>Limnotettix striata</i>              |                              | (Halka, 1965)                        |
| <i>Graphosoma italicum</i> (2n=14)      | Italian stink bug            | (Rufas and Giménez-Martín, 1986)     |
| <i>Puto albicans</i>                    | White mealy-bug              | (Brown and Cleveland, 1968)          |
| <i>Protenor belfragei</i> (2n=7)        |                              | (Schrader, 1935)                     |
| <i>Aspidproctus maximus</i>             |                              | (Hughes-Schrader, 1955)              |
| <i>Psammolestes coreodes</i> (2n=22)    | Blood-sucking bug (triatoma) | (Panzera et al., 1996)               |
| <i>Rhodnius ecuadoriensis</i> (2n=22)   | Blood-sucking bug (triatoma) | (Panzera et al., 1996)               |
| <i>Rhodnius nasutus</i> (2n=22)         | Blood-sucking bug (triatoma) | (Panzera et al., 1996)               |
| <i>Rhodnius neglectus</i> (2n=22)       | Blood-sucking bug (triatoma) | (Panzera et al., 1996)               |
| <i>Rhodnius neivai</i> (2n=22)          | Blood-sucking bug (triatoma) | (Panzera et al., 1996)               |
| <i>Rhodnius pallenscens</i> (2n=22)     | Blood-sucking bug (triatoma) | (Panzera et al., 1996)               |
| <i>Rhodnius pictipes</i> (2n=22)        | Blood-sucking bug (triatoma) | (Panzera et al., 1996)               |
| <i>Rhodnius prolixus</i> (2n=22)        | Blood-sucking bug (triatoma) | (Panzera et al., 1996)               |
| <i>Rhodnius robustus</i> (2n=22)        | Blood-sucking bug (triatoma) | (Panzera et al., 1996)               |
| <i>Dipetalogaster maximus</i> (2n=22)   | Blood-sucking bug (triatoma) | (Panzera et al., 1996)               |
| <i>Mepraia spinolai</i> (2n=23-24)      | Blood-sucking bug (triatoma) | (Panzera et al., 1996)               |
| <i>Panstrongylus herreri</i> (2n=23)    | Blood-sucking bug (triatoma) | (Panzera et al., 1996)               |
| <i>Panstrongylus megistus</i> (2n=21)   | Blood-sucking bug (triatoma) | (Panzera et al., 1996)               |
| <i>Panstrongylus tupynambai</i> (2n=22) | Blood-sucking bug (triatoma) | (Panzera et al., 1996)               |
| <i>Triatoma barberi</i> (2n=22-24)      | Blood-sucking bug (triatoma) | (Panzera et al., 1996)               |

| Scientific name                               | Common name                  | Reference                       |
|-----------------------------------------------|------------------------------|---------------------------------|
| <i>Triatoma brasiliensis</i> (2n=22)          | Blood-sucking bug (triatoma) | (Panzera et al., 1996)          |
| <i>Triatoma circummaculata</i> (2n=22)        | Blood-sucking bug (triatoma) | (Panzera et al., 1996)          |
| <i>Triatoma delpontei</i> (2n=22)             | Blood-sucking bug (triatoma) | (Panzera et al., 1996)          |
| <i>Triatoma dimidiata</i> (2n=22-23)          | Blood-sucking bug (triatoma) | (Panzera et al., 1996)          |
| <i>Triatoma eratyrsiformis</i> (2n=24)        | Blood-sucking bug (triatoma) | (Panzera et al., 1996)          |
| <i>Triatoma gerstaeckeri</i> (2n=23)          | Blood-sucking bug (triatoma) | (Panzera et al., 1996)          |
| <i>Triatoma guasayana</i> (2n=22)             | Blood-sucking bug (triatoma) | (Panzera et al., 1996)          |
| <i>Triatoma infestans</i> (2n=22)             | Blood-sucking bug (triatoma) | (Panzera et al., 1996)          |
| <i>Triatoma krugi</i> (2n=22)                 | Blood-sucking bug (triatoma) | (Costa et al., 2008)            |
| <i>Triatoma lecticularia</i> (2n=22)          | Blood-sucking bug (triatoma) | (Panzera et al., 1996)          |
| <i>Triatoma lecticularia</i> (2n=22)          | Blood-sucking bug (triatoma) | (Panzera et al., 1996)          |
| <i>Triatoma longipennis</i> (2n=23)           | Blood-sucking bug (triatoma) | (Panzera et al., 1996)          |
| <i>Triatoma maculate</i> (2n=22)              | Blood-sucking bug (triatoma) | (Panzera et al., 1996)          |
| <i>Triatoma matogrossensis</i> (2n=22)        | Blood-sucking bug (triatoma) | (Panzera et al., 1996)          |
| <i>Triatoma mazzottii</i> (2n=23)             | Blood-sucking bug (triatoma) | (Panzera et al., 1996)          |
| <i>Triatoma melanosoma</i> (2n=22)            | Blood-sucking bug (triatoma) | (Panzera et al., 1996)          |
| <i>Triatoma nitida</i> (2n=21)                | Blood-sucking bug (triatoma) | (Panzera et al., 1996)          |
| <i>Triatoma patagonica</i> (2n=22)            | Blood-sucking bug (triatoma) | (Panzera et al., 1996)          |
| <i>Triatoma pallidipennis</i> (2n=22-23)      | Blood-sucking bug (triatoma) | (Panzera et al., 1996)          |
| <i>Triatoma peninsularis</i> (2n=23-24)       | Blood-sucking bug (triatoma) | (Panzera et al., 1996)          |
| <i>Triatoma picturata</i> (2n=23)             | Blood-sucking bug (triatoma) | (Panzera et al., 1996)          |
| <i>Triatoma platensis</i> (2n=22)             | Blood-sucking bug (triatoma) | (Panzera et al., 1996)          |
| <i>Triatoma protracta</i> (2n=23-24)          | Blood-sucking bug (triatoma) | (Panzera et al., 1996)          |
| <i>Triatoma pseudomaculata</i> (2n=22)        | Blood-sucking bug (triatoma) | (Panzera et al., 1996)          |
| <i>Triatoma rubida</i> (2n=23-24)             | Blood-sucking bug (triatoma) | (Panzera et al., 1996)          |
| <i>Triatoma rubrofasciata</i> (2n=25)         | Blood-sucking bug (triatoma) | (Panzera et al., 1996)          |
| <i>Triatoma rubrovaria</i> (2n=22)            | Blood-sucking bug (triatoma) | (Panzera et al., 1996)          |
| <i>Triatoma sanguisuga</i> (2n=23)            | Blood-sucking bug (triatoma) | (Panzera et al., 1996)          |
| <i>Triatoma sinaloensis</i> (2n=23-24)        | Blood-sucking bug (triatoma) | (Panzera et al., 1996)          |
| <i>Triatoma sordid</i> (2n=22)                | Blood-sucking bug (triatoma) | (Panzera et al., 1996)          |
| <i>Triatoma tibiamaculata</i> (2n=23-24)      | Blood-sucking bug (triatoma) | (Panzera et al., 1996)          |
| <i>Triatoma vitticeps</i> (2n=24-26)          | Blood-sucking bug (triatoma) | (Panzera et al., 1996)          |
| <i>Panstrongylus chinai</i> (2n=23)           | Blood-sucking bug (triatoma) | (Crossa et al., 2002)           |
| <i>Panstrongylus rufotuberculatus</i> (2n=23) | Blood-sucking bug (triatoma) | (Crossa et al., 2002)           |
| <i>Panstrongylus lignarius</i> (2n=23)        | Blood-sucking bug (triatoma) | (Crossa et al., 2002)           |
| <i>Panstrongylus geniculatus</i> (2n=23)      | Blood-sucking bug (triatoma) | (Crossa et al., 2002)           |
| <i>Megoura viciae</i> (2n=10)                 | Vetch aphid                  | (Manicardi et al., 1994)        |
| <i>Planococcus citri</i>                      | Citrus mealybug              | (Nur, 1968)                     |
| <i>Steatococcus tuberculatus</i>              |                              | (Hughes-Schrader and Ris, 1941) |
| <i>Tamalia coweni</i>                         | Bearberry aphid              | (Ris, 1942)                     |
| <i>Macrosiphum solanifolii</i>                | Aphid                        | (Lawson, 1936)                  |
| <i>Acyrtosiphon caraganae</i> (2n=10)         | Aphid                        | (Sun and Robinson, 1966)        |
| <i>Acyrtosiphon dishodum</i> (2n=18)          | Aphid                        | (Sun and Robinson, 1966)        |
| <i>Acyrtosiphon pisum</i> (2n=8)              | Pea aphid                    | (Sun and Robinson, 1966)        |
| <i>Amphorophora laingi</i> (2n=12)            | Aphid                        | (Sun and Robinson, 1966)        |
| <i>Amphorophora ribiella</i> (2n=12)          | Aphid                        | (Sun and Robinson, 1966)        |
| <i>Amphorophora tuberculata</i> (2n=3-4)      | Aphid                        | (Blackman, 1985)                |
| <i>Anoecia graminis</i> (2n=8)                | Aphid                        | (Sun and Robinson, 1966)        |
| <i>Aphis knowlioni</i> (2n=8)                 | Aphid                        | (Sun and Robinson, 1966)        |
| <i>Aphis corniella</i> (2n=8)                 | Aphid                        | (Sun and Robinson, 1966)        |
| <i>Aphis helianthi</i> (2n=8)                 | Aphid                        | (Sun and Robinson, 1966)        |
| <i>Aphis nasturlii</i> (2n=8)                 | Aphid                        | (Sun and Robinson, 1966)        |
| <i>Aphis neogillettei</i> (2n=8)              | Aphid                        | (Sun and Robinson, 1966)        |
| <i>Aphis rubicola</i> (2n=8)                  | Aphid                        | (Sun and Robinson, 1966)        |
| <i>Aphis spiraeicola</i> (2n=8)               | Aphid                        | (Sun and Robinson, 1966)        |
| <i>Aphis varians</i> (2n=8)                   | Aphid                        | (Sun and Robinson, 1966)        |
| <i>Aphthargelia symphoricarpi</i> (2n=14)     | Aphid                        | (Sun and Robinson, 1966)        |
| <i>Aspidaphis adjuvans</i> (2n=12)            | Aphid                        | (Sun and Robinson, 1966)        |
| <i>Brachycolus atriplicis</i> (2n=14)         | Aphid                        | (Sun and Robinson, 1966)        |
| <i>Brevicoryne brassicae</i> (2n=16)          | Aphid                        | (Sun and Robinson, 1966)        |
| <i>Calaphis betuae-colers</i> (2n=20)         | Aphid                        | (Sun and Robinson, 1966)        |
| <i>Capitophorus hippophaes</i> (2n=10)        | Aphid                        | (Sun and Robinson, 1966)        |

| Scientific name                             | Common name                 | Reference                   |
|---------------------------------------------|-----------------------------|-----------------------------|
| <i>Cinara braggii</i> (2n=10)               | Aphid                       | (Sun and Robinson, 1966)    |
| <i>Cinara pinea</i> (2n=10)                 | Aphid                       | (Sun and Robinson, 1966)    |
| <i>Cryptomyzus ribis</i> (2n=12)            | Aphid                       | (Sun and Robinson, 1966)    |
| <i>Cryptaphis poae</i> (2n=16)              | Aphid                       | (Sun and Robinson, 1966)    |
| <i>Dactynotus cirsii</i> (2n=10)            | Aphid                       | (Sun and Robinson, 1966)    |
| <i>Dactynotus taraxaci</i> (2n=12)          | Aphid                       | (Sun and Robinson, 1966)    |
| <i>Eriosoma lanigcrum</i> (2n=12)           | Aphid                       | (Sun and Robinson, 1966)    |
| <i>Euceraphis puncipennis</i> (2n=8)        | Aphid                       | (Sun and Robinson, 1966)    |
| <i>Gypsoaphis oestlundii</i> (2n=4)         | Aphid                       | (Sun and Robinson, 1966)    |
| <i>Kakimia essigi</i> (2n=10)               | Aphid                       | (Sun and Robinson, 1966)    |
| <i>Kakimia thomasi</i> (2n=10)              | Aphid                       | (Sun and Robinson, 1966)    |
| <i>Macrosiphoniella absinthii</i> (2n=12)   | Aphid                       | (Sun and Robinson, 1966)    |
| <i>Macrisiphoniella tanacetaria</i> (2n=12) | Aphid                       | (Sun and Robinson, 1966)    |
| <i>Macrosiphum avenae</i> (2n=18)           | Aphid                       | (Sun and Robinson, 1966)    |
| <i>Macrosiphum euphorbiae</i> (2n=10)       | Aphid                       | (Sun and Robinson, 1966)    |
| <i>Macrosiphum manitobensis</i> (2n=10)     | Aphid                       | (Sun and Robinson, 1966)    |
| <i>Masonaphis wahnaga</i> (2n=10)           | Aphid                       | (Sun and Robinson, 1966)    |
| <i>Myzocallis punctata</i> (2n=14)          | Aphid                       | (Sun and Robinson, 1966)    |
| <i>Myzus cerasi</i> (2n=10)                 | Aphid                       | (Sun and Robinson, 1966)    |
| <i>Myzus persicae</i> (2n=12)               | Green peach aphid           | (Sun and Robinson, 1966)    |
| <i>Nesonovia lactucae</i> (2n=12)           | Aphid                       | (Sun and Robinson, 1966)    |
| <i>Neoceruraphis viburnicola</i> (2n=14)    | Aphid                       | (Sun and Robinson, 1966)    |
| <i>Periphyllus negundinis</i> (2n=20)       | Aphid                       | (Sun and Robinson, 1966)    |
| <i>Pterocomma smithiae</i> (2n=8)           | Aphid                       | (Sun and Robinson, 1966)    |
| <i>Rhopalomyzus loniceræ</i> (2n=12)        | Aphid                       | (Sun and Robinson, 1966)    |
| <i>Rhopalosiphum fitchii</i> (2n=10)        | Aphid                       | (Sun and Robinson, 1966)    |
| <i>Rhopalosiphum maidis</i> (2n=8)          | Aphid                       | (Sun and Robinson, 1966)    |
| <i>Rhopalosiphum padi</i> (2n=8)            | Aphid                       | (Sun and Robinson, 1966)    |
| <i>Schizaphis graminum</i> (2n=8)           | Aphid                       | (Sun and Robinson, 1966)    |
| <i>Sipha agropyrella</i> (2n=6)             | Aphid                       | (Sun and Robinson, 1966)    |
| <i>Myzus varians</i>                        | Aphid                       | (Bizzaro et al., 1999)      |
| <i>Tetraneura nigriabdominalis</i>          | Aphid                       | (Galli and Manicardi, 1998) |
| <i>Tetraneura ulmi</i>                      | Aphid                       | (Galli and Manicardi, 1998) |
| <i>Aphis sumbuci</i> (2n=8)                 | Aphid                       | (Manicardi et al., 1998)    |
| <i>Aphis pomi</i>                           | Green apple aphid           | (Criniti et al., 2005)      |
| <i>Aphis nerii</i> (2n=8)                   | Aphid                       | (Mandrioli et al., 2011)    |
| <i>Schoutedenia lutea</i> (2n=14-16)        | Australian aphid            | (Hales, 1989)               |
| <i>Myzus antirrhinii</i> (2n=13-14)         | Aphid                       | (Spence et al., 1998)       |
| <i>Myzus cerus</i> (2n=12)                  | Aphid                       | (Spence et al., 1998)       |
| <i>Neuquenaphis bulcidauda</i> (2n=14)      | Aphid                       | (Blackman et al., 2003)     |
| <i>Neuquenaphis edwardsi</i> (2n=12)        | Aphid                       | (Blackman et al., 2003)     |
| <i>Neuquenaphis palliceus</i> (2n=6)        | Aphid                       | (Blackman et al., 2003)     |
| <i>Neuquenaphis schlingeri</i> (2n=12)      | Aphid                       | (Blackman et al., 2003)     |
| <i>Neuquenaphis sensoriata</i> (2n=16)      | Aphid                       | (Blackman et al., 2003)     |
| <i>Neuquenaphis similis</i> (2n=14)         | Aphid                       | (Blackman et al., 2003)     |
| <i>Neuquenaphis staryi</i> (2n=14)          | Aphid                       | (Blackman et al., 2003)     |
| <i>Neuquenaphis valdiviana</i> (2n=6)       | Aphid                       | (Blackman et al., 2003)     |
| <i>Neuquenaphis sp.A</i> (2n=12)            | Aphid                       | (Blackman et al., 2003)     |
| <i>Neuquenaphis sp.B</i> (2n=16)            | Aphid                       | (Blackman et al., 2003)     |
| <i>Neuquenaphis chilensis</i> (2n=10)       | Aphid                       | (Blackman et al., 2003)     |
| <i>Neuquenaphis essigi</i> (2n=12)          | Aphid                       | (Blackman et al., 2003)     |
| <i>Apiomorpha baeuerleni</i> (2n=4-6)       | <i>Apiomorpha Rübsaamen</i> | (Cook, 2000)                |
| <i>Apiomorpha tepperi</i> (2n=64)           | <i>Apiomorpha Rübsaamen</i> | (Cook, 2000)                |
| <i>Apiomorpha attenuate</i> (2n=~56-150)    | <i>Apiomorpha Rübsaamen</i> | (Cook, 2000)                |
| <i>Apiomorpha conica</i> (2n=18-22)         | <i>Apiomorpha Rübsaamen</i> | (Cook, 2000)                |
| <i>Apiomorpha frenchi</i> (2n=12-22)        | <i>Apiomorpha Rübsaamen</i> | (Cook, 2000)                |
| <i>Apiomorpha intermedia</i> (2n=12)        | <i>Apiomorpha Rübsaamen</i> | (Cook, 2000)                |
| <i>Apiomorpha sp.nov.A</i> (2n=4)           | <i>Apiomorpha Rübsaamen</i> | (Cook, 2000)                |
| <i>Apiomorpha sp.nov.B</i> (2n=~34)         | <i>Apiomorpha Rübsaamen</i> | (Cook, 2000)                |
| <i>Apiomorpha helmsii</i> (2n=~98)          | <i>Apiomorpha Rübsaamen</i> | (Cook, 2000)                |
| <i>Apiomorpha densispinosa</i> (2n=4)       | <i>Apiomorpha Rübsaamen</i> | (Cook, 2000)                |
| <i>Apiomorpha sp.nov.C</i> (2n=4)           | <i>Apiomorpha Rübsaamen</i> | (Cook, 2000)                |

| Scientific name                                       | Common name                  | Reference              |
|-------------------------------------------------------|------------------------------|------------------------|
| <i>Apiomorpha hilli</i> (2n=~42)                      | <i>Apiomorpha</i> Rübssaamen | (Cook, 2000)           |
| <i>Apiomorpha karschi</i> (2n=~62-122)                | <i>Apiomorpha</i> Rübssaamen | (Cook, 2000)           |
| <i>Apiomorpha malleacola</i> (2n=8-56)                | <i>Apiomorpha</i> Rübssaamen | (Cook, 2000)           |
| <i>Apiomorpha pomaphora</i> (2n=~56)                  | <i>Apiomorpha</i> Rübssaamen | (Cook, 2000)           |
| <i>Apiomorpha minor</i> (2n=10-84)                    | <i>Apiomorpha</i> Rübssaamen | (Cook, 2000)           |
| <i>Apiomorpha sessilis</i> (2n=4)                     | <i>Apiomorpha</i> Rübssaamen | (Cook, 2000)           |
| <i>Apiomorpha dipsaciformis</i> (2n=18)               | <i>Apiomorpha</i> Rübssaamen | (Cook, 2000)           |
| <i>Apiomorpha excupula</i> (2n=18)                    | <i>Apiomorpha</i> Rübssaamen | (Cook, 2000)           |
| <i>Apiomorpha munita</i> (2n=6-22)                    | <i>Apiomorpha</i> Rübssaamen | (Cook, 2000)           |
| <i>Apiomorpha munita munita</i> (2n=54)               | <i>Apiomorpha</i> Rübssaamen | (Cook, 2000)           |
| <i>Apiomorpha ovicola</i> (2n=62)                     | <i>Apiomorpha</i> Rübssaamen | (Cook, 2000)           |
| <i>Apiomorpha ovicoloides</i> (2n=38~76)              | <i>Apiomorpha</i> Rübssaamen | (Cook, 2000)           |
| <i>Apiomorpha withersi</i> (2n=40)                    | <i>Apiomorpha</i> Rübssaamen | (Cook, 2000)           |
| <i>Apiomorpha pharetrata</i> (2n=10-48 )              | <i>Apiomorpha</i> Rübssaamen | (Cook, 2000)           |
| <i>Apiomorpha rosaeformis</i> (2n=14)                 | <i>Apiomorpha</i> Rübssaamen | (Cook, 2000)           |
| <i>Apiomorpha spinifer</i> (2n=~132-164)              | <i>Apiomorpha</i> Rübssaamen | (Cook, 2000)           |
| <i>Apiomorpha duplex</i> (2n=24-28)                   | <i>Apiomorpha</i> Rübssaamen | (Cook, 2000)           |
| <i>Apiomorpha pileata S</i> (2n=4-6)                  | <i>Apiomorpha</i> Rübssaamen | (Cook, 2000)           |
| <i>Apiomorpha pileata N</i> (2n=34)                   | <i>Apiomorpha</i> Rübssaamen | (Cook, 2000)           |
| <i>Apiomorpha maliformis</i> (2n=18)                  | <i>Apiomorpha</i> Rübssaamen | (Cook, 2000)           |
| <i>Apiomorpha strombylosa E</i> (2n=32)               | <i>Apiomorpha</i> Rübssaamen | (Cook, 2000)           |
| <i>Apiomorpha strombylosa W</i> (2n=50)               | <i>Apiomorpha</i> Rübssaamen | (Cook, 2000)           |
| <i>Apiomorpha variabilis</i> (2n=80)                  | <i>Apiomorpha</i> Rübssaamen | (Cook, 2000)           |
| <i>Apiomorpha sp.nov.D</i> (2n=14)                    | <i>Apiomorpha</i> Rübssaamen | (Cook, 2000)           |
| <i>Apiomorpha pedunculata</i> (2n=38)                 | <i>Apiomorpha</i> Rübssaamen | (Cook, 2000)           |
| <i>Apiomorpha regularis</i> (2n=108)                  | <i>Apiomorpha</i> Rübssaamen | (Cook, 2000)           |
| <i>Apiomorpha subconica</i> (2n=~62-72)               | <i>Apiomorpha</i> Rübssaamen | (Cook, 2000)           |
| <i>Apiomorpha calycina</i> (2n=92)                    | <i>Apiomorpha</i> Rübssaamen | (Cook, 2000)           |
| <i>Apiomorpha longiloba</i> (2n=~178)                 | <i>Apiomorpha</i> Rübssaamen | (Cook, 2000)           |
| <i>Apiomorpha macqueeni</i> (2n=~192)                 | <i>Apiomorpha</i> Rübssaamen | (Cook, 2000)           |
| <i>Apiomorpha sloanei</i> (2n=~92-164)                | <i>Apiomorpha</i> Rübssaamen | (Cook, 2000)           |
| <i>Apiomorpha urnalis</i> (2n=~96-146)                | <i>Apiomorpha</i> Rübssaamen | (Cook, 2000)           |
| <i>Apiomorpha sp.nov.E</i> (2n=4)                     | <i>Apiomorpha</i> Rübssaamen | (Cook, 2000)           |
| <i>Apiomorpha sp.nov.F</i> (2n=10)                    | <i>Apiomorpha</i> Rübssaamen | (Cook, 2000)           |
| <i>Apiomorpha sp.nov.G</i> (2n=10)                    | <i>Apiomorpha</i> Rübssaamen | (Cook, 2000)           |
| <i>Apiomorpha sp.nov.H</i> (2n=72)                    | <i>Apiomorpha</i> Rübssaamen | (Cook, 2000)           |
| <i>Apiomorpha sp.nov.I</i> (2n=108)                   | <i>Apiomorpha</i> Rübssaamen | (Cook, 2000)           |
| <i>Ascelis praemollis</i> (2n=16)                     | Australian Eriococcidae      | (Cook, 2000)           |
| <i>Cylindrococcus spiniferus</i> (2n=18)              | Australian Eriococcidae      | (Cook, 2000)           |
| <i>Cylindrococcus casuarinae</i> (2n=6)               | Australian Eriococcidae      | (Cook, 2000)           |
| <i>Eriococcus sp.nr. leptospermi</i> (2n=18)          | Australian Eriococcidae      | (Cook, 2000)           |
| <i>Eriococcus sp.nr. hakeae</i> (2n=18)               | Australian Eriococcidae      | (Cook, 2000)           |
| <i>Lachnodius lectularius</i> (2n=18)                 | Australian Eriococcidae      | (Cook, 2000)           |
| <i>Lachnodius sp.nov.1</i> (2n=18)                    | Australian Eriococcidae      | (Cook, 2000)           |
| <i>Lachnodius sp.nov.2</i> (2n=18)                    | Australian Eriococcidae      | (Cook, 2000)           |
| <i>Lachnodius sp.nov.3</i> (2n=18)                    | Australian Eriococcidae      | (Cook, 2000)           |
| <i>Madarococcus sp.nov.</i> (2n=18)                   | Australian Eriococcidae      | (Cook, 2000)           |
| <i>Opisthoscelis convexa</i> (2n=18)                  | Australian Eriococcidae      | (Cook, 2000)           |
| <i>Opisthoscelis maculate</i> (2n=18)                 | Australian Eriococcidae      | (Cook, 2000)           |
| <i>Opisthoscelis subrotunda</i> (2n=18)               | Australian Eriococcidae      | (Cook, 2000)           |
| <i>Phacelococcus subcorticalis</i> (2n=18)            | Australian Eriococcidae      | (Cook, 2000)           |
| <i>"Sphaerococcus" socialis</i> (2n=18)               | Australian Eriococcidae      | (Cook, 2000)           |
| <i>Dysdercus albofasciatus</i>                        | Staining bug                 | (Bressa et al., 2002)  |
| <i>Dundocoris nodulicarinus nodulicarinus</i> (2n=16) |                              | (Jacobs, 2004)         |
| <i>Dundocoris nodulicarinus novenas</i> (2n=12)       |                              | (Jacobs, 2004)         |
| <i>Dundocoris nodulicarinus septeni</i> (2n=10)       |                              | (Jacobs, 2004)         |
| <i>Nabis indicus</i> (2n=34)                          | Damsel bug                   | (Grozeva et al., 2004) |
| <i>Nabis viridulus</i> Spinola (2n=34)                | Damsel bug                   | (Grozeva et al., 2004) |
| <i>Himacerus mirmicoides</i> (2n=34)                  | Damsel bug                   | (Grozeva et al., 2004) |
| <i>Prostemma guttula</i> (2n=28)                      | Damsel bug                   | (Grozeva et al., 2004) |
| <i>Notonecta glauca</i> (2n=28)                       |                              | (Angus et al., 2004)   |
| <i>Notonecta maculate</i> (2n=24)                     |                              | (Angus et al., 2004)   |

| Scientific name                            | Common name         | Reference                                 |
|--------------------------------------------|---------------------|-------------------------------------------|
| <i>Notonecta oblique</i> (2n=24)           |                     | (Angus et al., 2004)                      |
| <i>Notonecta viridis</i> (2n=24)           |                     | (Angus et al., 2004)                      |
| <i>Spartocera fusca</i> (2n=23-24)         | Coreid nymph        | (Cattani and Papeschi, 2004)              |
| <i>Tenagobia fuscata</i> (2n=30)           | Water boatman       | (Ituarte and Papeschi, 2004)              |
| <i>Oncopeltus fasciatus</i>                | Large milkweed bug  | (Wolfe and John, 1965)                    |
| <i>Oncopsis avellanae</i> (2n=11-12)       |                     | (John and Claridge, 1974)                 |
| <i>Oncopsis carpini</i> (2n=11-12)         |                     | (John and Claridge, 1974)                 |
| <i>Oncopsis flavicollis</i> (2n=11-12)     |                     | (John and Claridge, 1974)                 |
| <i>Oncopsis subangulata</i> (2n=11-12)     |                     | (John and Claridge, 1974)                 |
| <i>Oncopsis sp.nov.</i> (2n=11-12)         |                     | (John and Claridge, 1974)                 |
| <i>Oncopsis alni</i> (2n=10-11)            |                     | (John and Claridge, 1974)                 |
| <i>Oncopsis tristis</i> (2n=11-12)         |                     | (John and Claridge, 1974)                 |
| <i>Philaenus arslani</i> (2n=20)           | Lebanese spittlebug | (Kuznetsova et al., 2008)                 |
| <i>Craspedolepta flava</i> (2n=25-26)      |                     | (Labina et al., 2007)                     |
| <i>Craspedolepta kerzhneri</i> (2n=25-26)  |                     | (Labina et al., 2007)                     |
| <i>Craspedolepta lineolata</i> (2n=25-26)  |                     | (Labina et al., 2007)                     |
| <i>Craspedolepta terminate</i> (2n=25-26)  |                     | (Labina et al., 2007)                     |
| <i>Craspedolepta topicalis</i> (2n=25-26)  |                     | (Labina et al., 2007)                     |
| <i>Arytainilla spartiophila</i> (2n=23-24) |                     | (Labina et al., 2007)                     |
| <i>Livilla nervosa</i> (2n=25-26)          |                     | (Labina et al., 2007)                     |
| <i>Livilla pyrenaica</i> (2n=25-26)        |                     | (Labina et al., 2007)                     |
| <i>Livilla retamae</i> (2n=25-26)          |                     | (Labina et al., 2007)                     |
| <i>Diaphorina putonii</i> (2n=25-26)       |                     | (Labina et al., 2007)                     |
| <i>Ligustrinia herculeana</i> (2n=25-26)   |                     | (Labina et al., 2007)                     |
| <i>Psylla ginnali</i> (2n=25-26)           |                     | (Labina et al., 2007)                     |
| <i>Cacopsylla intact</i> (2n=25-26)        |                     | (Labina et al., 2007)                     |
| <i>Ctenarytaina eucalypti</i> (2n=9-10)    |                     | (Labina et al., 2007)                     |
| <i>Strophingia arborea</i> (2n=25-26)      |                     | (Labina et al., 2007)                     |
| <i>Strophingia fallax</i> (2n=25-26)       |                     | (Labina et al., 2007)                     |
| <i>Bactericera nigricornis</i> (2n=26)     |                     | (Labina et al., 2007)                     |
| <i>Trichohermes grandis</i> (2n=25-26)     |                     | (Labina et al., 2007)                     |
| <i>Trioza elaeagni</i> (2n=25-26)          |                     | (Labina et al., 2007)                     |
| <i>Philaenus spumarius</i>                 | Meadow spittlebug   | (Kuznetsova et al., 2003)                 |
| <i>Limnogonus aduncus</i>                  | Pond skater         | (Castanhole et al., 2008)                 |
| <i>Nezara viridula</i>                     |                     | (Camacho et al., 1985)                    |
| <i>Paurocephala hottentotti</i> (2n=25-26) |                     | (Maryńska-Nadachowska and Głowacka, 2005) |
| <i>Paurocephala bicarinata</i> (2n=25-26)  |                     | (Maryńska-Nadachowska and Głowacka, 2005) |
| <i>Paurocephala sp.nov.</i> (2n=25-26)     |                     | (Maryńska-Nadachowska and Głowacka, 2005) |
| <i>Euphyllura longiciliata</i> (2n=25-26)  |                     | (Maryńska-Nadachowska and Głowacka, 2005) |
| <i>Diaphorina acokantherae</i> (2n=25-26)  |                     | (Maryńska-Nadachowska and Głowacka, 2005) |
| <i>Diaphorina helichrysi</i> (2n=25-26)    |                     | (Maryńska-Nadachowska and Głowacka, 2005) |
| <i>Diaphorina loranthi</i> (2n=25-26)      |                     | (Maryńska-Nadachowska and Głowacka, 2005) |
| <i>Diaphorina petteyi</i> (2n=25-26)       |                     | (Maryńska-Nadachowska and Głowacka, 2005) |
| <i>Diaphorina virgata</i> (2n=25-26)       |                     | (Maryńska-Nadachowska and Głowacka, 2005) |
| <i>Peripsyllopsis speciosa</i> (2n=9-10)   |                     | (Maryńska-Nadachowska and Głowacka, 2005) |
| <i>Euphalerus isitis</i> (2n=25-26)        |                     | (Maryńska-Nadachowska and Głowacka, 2005) |
| <i>Colophorina sp.nov.</i> (2n=23-24)      |                     | (Maryńska-Nadachowska and Głowacka, 2005) |
| <i>Acizzia uncatoides</i> (2n=25-26)       |                     | (Maryńska-Nadachowska and Głowacka, 2005) |
| <i>Ciriactremum capense</i> (2n=25-26)     |                     | (Maryńska-Nadachowska and Głowacka, 2005) |
| <i>Calophya schini</i> (2n=25-26)          |                     | (Maryńska-Nadachowska and Głowacka, 2005) |
| <i>Trioza afrobsoleta</i> (25-26)          |                     | (Maryńska-Nadachowska and Głowacka, 2005) |
| <i>Trioza carvalhoi</i> (2n=25-26)         |                     | (Maryńska-Nadachowska and Głowacka, 2005) |
| <i>Trioza thibae</i> (2n=25-26)            |                     | (Maryńska-Nadachowska and Głowacka, 2005) |
| <i>Pauropsylla tricheata</i> (2n=27-28)    |                     | (Maryńska-Nadachowska and Głowacka, 2005) |
| <i>Pseudococcus obscures</i> (2n=10)       | Mealy bug           | (Nur, 1970)                               |
| <i>Edessa irrorata</i> (2n=18)             | Stink bug           | (Schrader, 1941)                          |
| <i>Myrmus miriformis</i>                   |                     | (Nokkala and Nokkala, 1997)               |
| <i>Cacopsylla mali</i>                     | Apple psyllid       | (Nokkala et al., 2006)                    |
| <i>Cacopsylla myrtilli</i> (2n=26)         |                     | (Nokkala et al., 2008)                    |
| <i>Psylla foersteri</i> (2n=15-16)         | Psyllid             | (Nokkala et al., 2004)                    |
| <i>Arachnocoris trinitatus</i> (2n=10)     | Nabid bug           | (Kuznetsova et al., 2007)                 |
| <i>Dysdercus cingulatus</i> (2n=14-16)     |                     | (Ueshima, 1979)                           |

| Scientific name                            | Common name | Reference                                 |
|--------------------------------------------|-------------|-------------------------------------------|
| <i>Dysdercus fasciatus</i> (2n=14-16)      |             | (Ueshima, 1979)                           |
| <i>Dysdercus intermedius</i> (2n=14-16)    |             | (Ruthmann and Permantier, 1973)           |
| <i>Dysdercus koenigii</i> (2n=14-16)       |             | (Ueshima, 1979)                           |
| <i>Dysdercus supersticiosus</i> (2n=14-16) | Cotton bug  | (Kuznetsova, 1988)                        |
| <i>Dysdercus chaquensis</i> (2n=13-14)     |             | (Mola and Papeschi, 1997)                 |
| <i>Dysdercus ruficollis</i> (2n=13-14)     |             | (Piza, 1947)                              |
| <i>Dysdercus honestus</i> (2n=15-16)       |             | (Piza, 1947)                              |
| <i>Dysdercus peruvianus</i> (2n=16-17)     |             | (Piza, 1947)                              |
| <i>Dysdercus albofasciatus</i> (2n=12)     |             | (Bressa et al., 1999)                     |
| <i>Dysdercus imitator</i> (2n=11-12)       |             | (Bressa et al., 2003)                     |
| <i>Pyrrhocoris apterus</i> (2n=23-24)      |             | (Suja et al., 2000)                       |
| <i>Coreus marginatus</i> (2n=20-22)        |             | (Suja et al., 2000)                       |
| <i>Anasa tristis</i>                       | Squash bug  | (Lefevre and McGill, 1908)                |
| <i>Anasa junius</i>                        |             | (Lefevre and McGill, 1908)                |
| <i>Cacopsylla peregrine</i> (2n=26)        |             | (Nokkala et al., 2003)                    |
| <i>Hishimonus phycitis</i> (2n=11-12)      | Leafhopper  | (Sharma and Gupta, 1980)                  |
| <i>Chiasmus arori</i> (2n=16)              |             | (Sharma and Gupta, 1980)                  |
| <i>Craspedolepta sonchi</i> (2n=25-26)     |             | (Maryańska-Nadachowska et al., 2001)      |
| <i>Diaphorina chobauti</i> (2n=25-26)      |             | (Maryańska-Nadachowska et al., 2001)      |
| <i>Diaphorina lamproptera</i> (2n=25-26)   |             | (Maryańska-Nadachowska et al., 2001)      |
| <i>Cacopsylla palmeni</i> (2n=25-26)       |             | (Maryańska-Nadachowska et al., 2001)      |
| <i>Cacopsylla hippophaes</i> (2n=25-26)    |             | (Maryańska-Nadachowska et al., 2001)      |
| <i>Cacopsylla melanoneura</i> (2n=25-26)   |             | (Maryańska-Nadachowska et al., 2001)      |
| <i>Cacopsylla pyricola</i> (2n=25-26)      |             | (Maryańska-Nadachowska et al., 2001)      |
| <i>Cacopsylla moscovita</i> (2n=25-26)     |             | (Maryańska-Nadachowska et al., 2001)      |
| <i>Bactericera salicivora</i> (2n=26)      |             | (Maryańska-Nadachowska et al., 2001)      |
| <i>Trioza abdominalis</i> (2n=25-26)       |             | (Maryańska-Nadachowska et al., 2001)      |
| <i>Trioza lauri</i> (2n=25-26)             |             | (Maryańska-Nadachowska et al., 2001)      |
| <i>Cacopsylla mali</i> (2n=23-26)          |             | (Maryańska-Nadachowska and Grozeva, 2001) |
| <i>Cacopsylla sorbi</i> (2n=22)            |             | (Maryańska-Nadachowska and Grozeva, 2001) |
| <i>Ribautodelphax collinus</i> (2n=32)     | Planthopper | (Bieman, 1988)                            |
| <i>Ribautodelphax angulosus</i> (2n=30)    | Planthopper | (Bieman, 1988)                            |
| <i>Ribautodelphax pungens</i> (2n=30)      | Planthopper | (Bieman, 1988)                            |
| <i>Ribautodelphax imitans</i> (2n=30)      | Planthopper | (Bieman, 1988)                            |
| <i>Ribautodelphax fanari</i> (2n=30)       | Planthopper | (Bieman, 1988)                            |
| <i>Ribautodelphax pallens</i> (2n=30)      | Planthopper | (Bieman, 1988)                            |
| <i>Ribautodelphax albostriatus</i> (2n=30) | Planthopper | (Bieman, 1988)                            |
| <i>Ribautodelphax sp.nov.1</i> (2n=30)     | Planthopper | (Bieman, 1988)                            |
| <i>Ribautodelphax sp.nov.2</i> (2n=30)     | Planthopper | (Bieman, 1988)                            |
| <i>Ribautodelphax sp.nov.3</i> (2n=30)     | Planthopper | (Bieman, 1988)                            |
| <i>Ribautodelphax sp.nov.4</i> (2n=30)     | Planthopper | (Bieman, 1988)                            |
| <i>Belostoma elegans</i> (2n=32)           |             | (Papeschi, 1988)                          |
| <i>Belostoma micantulum</i> (2n=16)        |             | (Papeschi, 1988)                          |
| <i>Belostoma oxyurum</i> (2n=8)            |             | (Papeschi, 1988)                          |
| <i>Blissus arenarius</i> (2n=14)           |             | (Ueshima, 1979)                           |
| <i>Capriobia pallipes</i> (2n=16)          |             | (Ueshima, 1979)                           |
| <i>Rhyodes clavicornis</i> (2n=16)         |             | (Ueshima, 1979)                           |
| <i>Pylorgus colon</i> (2n=16)              |             | (Ueshima, 1979)                           |
| <i>Kleidocerys franciscanus</i> (2n=16)    |             | (Ueshima, 1979)                           |
| <i>Antillocoris minutes</i> (2n=16)        |             | (Ueshima, 1979)                           |
| <i>Tingis lasiocera</i> (2n=14)            |             | (Ueshima, 1979)                           |
| <i>Lethaeus barberi</i> (2n=12)            |             | (Ueshima, 1979)                           |
| <i>Leptocoris rubrolineatus</i> (2n=14)    |             | (Ueshima, 1979)                           |
| <i>Ambrysus mormon</i> (2n=24)             |             | (Ueshima, 1979)                           |
| <i>Merragata hebroides</i> (2n=28)         |             | (Ueshima, 1979)                           |
| <i>Cletus bipunctatus</i> (2n=18)          |             | (Ueshima, 1979)                           |
| <i>Archimerus calcarator</i> (2n=16)       |             | (Ueshima, 1979)                           |
| <i>Anispos fieberi</i> (2n=26)             |             | (Ueshima, 1979)                           |
| <i>Cimex lectularius</i>                   |             | (Ueshima, 1979)                           |
| <i>Pachylis gigas</i>                      |             | (Schrader, 1932)                          |
| <i>Acanthocoris scabrator</i>              |             | (Sands, 1982)                             |
| <i>Cimex antennatus</i> (2n=24)            |             | (Ueshima, 1979)                           |



| Scientific name                                   | Common name                | Reference                     |
|---------------------------------------------------|----------------------------|-------------------------------|
| <i>Cimex incrasatus</i> (2n=22)                   |                            | (Ueshima, 1979)               |
| <i>Cimex pilosellus</i> (2n=31)                   |                            | (Ueshima, 1979)               |
| <i>Cimex brevis</i> (2n=33)                       |                            | (Ueshima, 1979)               |
| <i>Cimex adjunctus</i> (2n=33)                    |                            | (Ueshima, 1979)               |
| <i>Hesperocimex sonorensis</i>                    |                            | (Ueshima, 1979)               |
| <i>Hesperocimex cochimiensis</i>                  |                            | (Ueshima, 1979)               |
| <b>Psocoptera</b>                                 |                            |                               |
| <i>Psococera gibbosa</i> (2n=17)                  | Barkfly                    | (Golub et al., 2004)          |
| <i>Amphipsocus japonicus</i> (2n=16)              | Bark lice                  | (Golub et al., 2004)          |
| <i>Liposcelis bostrychophilus</i> (2n=16)         | Common book louse          | (Jostes, 1975)                |
| <i>Lepinotus reticulatus</i> (2n=18)              |                            | (Jostes, 1975)                |
| <i>Blaste conspurcata</i> (2n=17)                 |                            | (Golub et al., 2004)          |
| <i>Aaroniella badonelli</i> (2n=18)               |                            | (Nokkala and Golub, 2006)     |
| <i>Ectopsocus meridionalis</i> Ribaga (2n=18)     |                            | (Nokkala and Golub, 2006)     |
| <i>Ectopsocus meridionalis</i> Valenzuela (2n=18) |                            | (Nokkala and Golub, 2006)     |
| <i>Valenzuela flavidus</i> (2n=18)                |                            | (Nokkala and Golub, 2002)     |
| <i>Peripsocus subfasciatus</i> (2n=18)            |                            | (Nokkala and Golub, 2002)     |
| <i>Trichadenotecnum majus</i> (2n=18)             |                            | (Nokkala and Golub, 2002)     |
| <i>Dorypteryx domestica</i> (2n=29-30)            |                            | (Golub and Kučerová, 2008)    |
| <b>Phthiraptera</b>                               |                            |                               |
| <i>Pediculus humanus humanus</i> (2n=10)          | Body louse                 | (Pittendrigh et al., 2006)    |
| <i>Polyplax serrata</i> (2n=16)                   | Sucking louse              | (Golub and Nokkala, 2004)     |
| <i>Hoplopleura</i> sp. (2n=16)                    | Sucking louse              | (Golub and Nokkala, 2004)     |
| <i>Menacanthus stramineus</i> (2n=10)             | Louse                      | (Tombesi and Pappaschi, 1993) |
| <i>Bovicola limbata</i> (2n=7)                    | Goat biting louse          | (Tombesi et al., 1998)        |
| <i>Bovicola caprae</i> (2n=7)                     | Goat biting louse          | (Tombesi et al., 1998)        |
| <i>Goniodes stylifer</i> (2n=24)                  | Louse                      | (Tombesi et al., 1998)        |
| <i>Gyropus ovalis</i> (2n=4)                      | Louse                      | (Tombesi et al., 1998)        |
| <i>Lipeurus baculus</i> (2n=11-12)                | Louse                      | (Tombesi et al., 1998)        |
| <i>Haematopinus suis</i> (2n=10)                  | Louse                      | (Bayreuther, 1955)            |
| <i>Haematopinus asini</i>                         | Louse                      | (Tombesi et al., 1998)        |
| <i>Haematopinus consobrinus</i>                   | Louse                      | (Tombesi et al., 1998)        |
| <i>Lignognathus tenuirostris</i>                  | Louse                      | (Tombesi et al., 1998)        |
| <i>Pediculus capitis</i> (2n=12)                  | Louse                      | (Tombesi et al., 1998)        |
| <i>Pediculus corporis</i> (2n=12)                 | Louse                      | (Tombesi et al., 1998)        |
| <i>Pediculus vestiminti</i> (2n=10)               | Louse                      | (Tombesi et al., 1998)        |
| <b>Lepidoptera</b>                                |                            |                               |
| <i>Ostrinia scapularis</i> (2n=62)                | Adzuki bean borer          | (Kageyama and Traut, 2003)    |
| <i>Ostrinia nubilalis</i> (2n=)                   | European corn borer        | (Belloncik et al., 2007)      |
| <i>Pieris brassicae</i> (2n=30)                   |                            | (Rishi and Rishi, 1977)       |
| <i>Bombyx mori</i> (2n=56)                        | Silkworm                   | (Murakami and Imai, 1974)     |
| <i>Bombyx mandarina</i> (2n=54)                   | Silkworm                   | (Murakami and Imai, 1974)     |
| <i>Euxoa messoria</i> (2n=62)                     | Darksided cutworm          | (Fontana, 1976)               |
| <i>Euxoa annir</i> (2n=62)                        |                            | (Fontana, 1976)               |
| <i>Euxoa declarata</i> (2n=62)                    |                            | (Fontana, 1976)               |
| <i>Euxoa rockburnei</i> (2n=62)                   |                            | (Fontana, 1976)               |
| <i>Euxoa Shasta</i> (2n=62)                       |                            | (Fontana, 1976)               |
| <i>Euxoa biformata</i> (2n=62)                    |                            | (Fontana, 1976)               |
| <i>Malacosoma disstria</i>                        | Forest tent caterpillar    | (Ennis and Sohi, 1976)        |
| <i>Choristoneura fumiferana</i>                   | Spure budworm              | (Ennis and Sohi, 1976)        |
| <i>Mamestra brassicae</i>                         | Cabbage moth               | (Mandrioli, 2002)             |
| <i>Cydia pomonella</i> (2n=56)                    | Codling moth               | (Fuková et al., 2005)         |
| <i>Wallengrenia otho curassavica</i> (2n=28-30)   | Skipper butterfly          | (Emmel and Trew, 1973)        |
| <i>Bicyclus anynana</i> (2n=28)                   | Butterfly                  | (Hof et al., 2008)            |
| <i>Spodoptera frugiperda</i>                      | Fall armyworm              | (d'Alençon et al., 2004)      |
| <i>Orgyia atiqua</i> (2n=28)                      |                            | (Rego and Marec, 2003)        |
| <i>Ephestia kuehniella</i> (2n=59)                |                            | (Rego and Marec, 2003)        |
| <i>Lymantria dispar</i>                           | Gypsy moth                 | (Traut and Marec, 1997)       |
| <i>Phragmatobia fuliginosa</i>                    | Ruby Tiger                 | (Traut and Marec, 1997)       |
| <i>Orgyia thyellina</i>                           | White-spotted Tussock moth | (Traut and Marec, 1997)       |
| <i>Orgyia antiqua</i>                             | Rusty Tussock moth         | (Traut and Marec, 1997)       |
| <i>Samia Cynthia</i>                              | Ailantus silkmoth          | (Traut and Marec, 1997)       |

| Scientific name                                   | Common name            | Reference                               |
|---------------------------------------------------|------------------------|-----------------------------------------|
| <i>Micropterix calthella</i>                      |                        | (Traut and Marec, 1997)                 |
| <i>Agrodiaetus admetus</i> (2n=80)                | Agrodiaetus butterfly  | (Lukhtanov and Dantchenko, 2002)        |
| <i>Agrodiaetus admetus</i> spp. (2n=79)           | Agrodiaetus butterfly  | (Lukhtanov and Dantchenko, 2002)        |
| <i>Agrodiaetus altivagans</i> (2n=20-23)          | Agrodiaetus butterfly  | (Lukhtanov and Dantchenko, 2002)        |
| <i>Agrodiaetus aserbeidschanus</i> (2n=23)        | Agrodiaetus butterfly  | (Lukhtanov and Dantchenko, 2002)        |
| <i>Agrodiaetus ciscaucasicus</i> (2n=40)          | Agrodiaetus butterfly  | (Lukhtanov and Dantchenko, 2002)        |
| <i>Agrodiaetus damocles krymaeus</i> (2n=26)      | Agrodiaetus butterfly  | (Lukhtanov and Dantchenko, 2002)        |
| <i>Agrodiaetus damone altaicus</i> (2n=67)        | Agrodiaetus butterfly  | (Lukhtanov and Dantchenko, 2002)        |
| <i>Agrodiaetus demavendi</i> (2n=28-72)           | Agrodiaetus butterfly  | (Lukhtanov and Dantchenko, 2002)        |
| <i>Agrodiaetus eriwanensis</i> (2n=28-35)         | Agrodiaetus butterfly  | (Lukhtanov and Dantchenko, 2002)        |
| <i>Agrodiaetus erschoffi</i> (2n=13)              | Agrodiaetus butterfly  | (Lukhtanov and Dantchenko, 2002)        |
| <i>Agrodiaetus huberti</i> (2n=35-37)             | Agrodiaetus butterfly  | (Lukhtanov and Dantchenko, 2002)        |
| <i>Agrodiaetus iphigenia</i> (2n=14)              | Agrodiaetus butterfly  | (Lukhtanov and Dantchenko, 2002)        |
| <i>Agrodiaetus iphigenides</i> (2n=~65-67)        | Agrodiaetus butterfly  | (Lukhtanov and Dantchenko, 2002)        |
| <i>Agrodiaetus juldusus kasachstanus</i> (2n=67)  | Agrodiaetus butterfly  | (Lukhtanov and Dantchenko, 2002)        |
| <i>Agrodiaetus ninae</i> (2n=33-34)               | Agrodiaetus butterfly  | (Lukhtanov and Dantchenko, 2002)        |
| <i>Agrodiaetus phyllides</i> (2n=~66)             | Agrodiaetus butterfly  | (Lukhtanov and Dantchenko, 2002)        |
| <i>Agrodiaetus phyllides sheljuzhkoi</i> (2n=~80) | Agrodiaetus butterfly  | (Lukhtanov and Dantchenko, 2002)        |
| <i>Agrodiaetus poseidonides</i> (2n=24)           | Agrodiaetus butterfly  | (Lukhtanov and Dantchenko, 2002)        |
| <i>Agrodiaetus pseudactis</i> (2n=29)             | Agrodiaetus butterfly  | (Lukhtanov and Dantchenko, 2002)        |
| <i>Agrodiaetus ripartii</i> (2n=90)               | Agrodiaetus butterfly  | (Lukhtanov and Dantchenko, 2002)        |
| <i>Agrodiaetus schamil</i> (2n=17)                | Agrodiaetus butterfly  | (Lukhtanov and Dantchenko, 2002)        |
| <i>Agrodiaetus surakovi</i> (2n=50)               | Agrodiaetus butterfly  | (Lukhtanov and Dantchenko, 2002)        |
| <i>Agrodiaetus turcicus</i> (2n=24)               | Agrodiaetus butterfly  | (Lukhtanov and Dantchenko, 2002)        |
| <i>Antheraea yamamai</i>                          |                        | (Imanishi et al., 2003)                 |
| <b>Trichoptera</b>                                |                        |                                         |
| <i>Limnephilus decipiens</i> (2n=20)              | Caddis fly             | (Wolf et al., 1997)                     |
| <b>Zoroptera</b>                                  |                        |                                         |
| <i>Zorotypus hubbardi</i>                         | Hubbard's angel insect | (Kuznetsova et al., 2002)               |
| <b>Dermaptera</b>                                 |                        |                                         |
| <i>Forficula auricularia</i> (2n=12-48)           | European earwig        | (Webb and White, 1970)                  |
| <i>Arixenia esau</i>                              | Earwig                 | (White, 1972)                           |
| <i>Labidura truncata</i>                          | Brown earwig           | (Giles and Webb, 1972)                  |
| <i>Labidura riparia</i> (2n=12)                   |                        | (Ortiz, 1969)                           |
| <i>Anechura bipunctata</i> (2n=24)                |                        | (Ortiz, 1969)                           |
| <i>Euborellia moesta</i> (2n=25-26)               |                        | (Ortiz, 1969)                           |
| <i>Pseudochelidura sinuate</i> (2n=25-26)         |                        | (Ortiz, 1969)                           |
| <i>Nala lividipes</i> (2n=37-38)                  |                        | (Ortiz, 1969)                           |
| <i>Forficula auricularia</i> (2n=24-25)           |                        | (Ortiz, 1969)                           |
| <i>Diplatys gladiator</i> (2n=18)                 |                        | (Srikantappa and Aswathanarayana, 1978) |
| <i>Forficula</i> sp (2n=27)                       |                        | (Srikantappa and Aswathanarayana, 1978) |
| <i>Hemimerus bouvieri</i> (2n=7-8)                |                        | (White, 1971)                           |
| <b>Odonata</b>                                    |                        |                                         |
| <i>Lestes virens</i> (2n=26)                      |                        | (Kiauta, 1969)                          |
| <i>Lestes viridis</i> (2n=26)                     |                        | (Kiauta, 1969)                          |
| <i>Gomphus graslini</i> (2n=23)                   |                        | (Kiauta, 1969)                          |
| <i>Onychogomphus forcipatus</i> (2n=24)           |                        | (Kiauta, 1969)                          |
| <i>Aeshna mixta</i> (2n=27)                       |                        | (Kiauta, 1969)                          |
| <i>Aeshna confuse</i>                             |                        | (Mola, 1995)                            |
| <i>Aeshna bonariensis</i>                         |                        | (Mola, 1995)                            |
| <i>Aeshna cornigera planaltica</i>                |                        | (Mola, 1995)                            |
| <i>Planaeschna milnei</i> (2n=28)                 |                        | (Kiauta, 1969)                          |
| <i>Hemianax papuensis</i> (2n=28)                 |                        | (Kiauta, 1969)                          |
| <i>Macrolophus costalis</i> (2n=28)               | Miridae bug            | (Grozeva et al., 2006)                  |
| <i>Somatochlora metallica</i> (2n=25-26)          | Brilliant emerald      | (Nokkala et al., 2002)                  |
| <i>Aeshna grandis</i> (2n=25-26)                  | Brown hawket           | (Nokkala et al., 2002)                  |
| <i>Gomphus epoptalmus</i>                         |                        | (Perepelov et al., 2001)                |
| <i>Gomphus vulgatissimus</i>                      |                        | (Perepelov et al., 2001)                |
| <i>Nihonogomphus ruptus</i>                       |                        | (Perepelov et al., 2001)                |
| <i>Anotogaster sieboldii</i>                      |                        | (Perepelov et al., 2001)                |
| <i>Somatochlora graeseri</i>                      |                        | (Perepelov et al., 2001)                |
| <b>Ephemeroptera</b>                              |                        |                                         |

| Scientific name                             | Common name              | Reference                       |
|---------------------------------------------|--------------------------|---------------------------------|
| <i>Cloeon dipterum</i>                      |                          | (Kiauta and Mol, 1977)          |
| <b>Brine-shrimp (Artemia)</b>               |                          |                                 |
| <i>Artemia salina</i> (2n=42)               | Brine shrimp             | (Squire, 1973)                  |
| <b>Scorpion (Buthida species)</b>           |                          |                                 |
| <i>Androctonus australis</i>                | Fat-tail scorpion        | (Schneider et al., 2009)        |
| <i>Androctonus bicolor</i>                  | Fat-tail scorpion        | (Schneider et al., 2009)        |
| <i>Androctonus amoreuxi</i>                 | Fat-tail scorpion        | (Schneider et al., 2009)        |
| <i>Androctonus crassicauda</i>              | Fat-tail scorpion        | (Schneider et al., 2009)        |
| <i>Centruroides vittatus</i>                | Stripe-bark scorpion     | (Schneider et al., 2009)        |
| <i>Hemilychas alexandrines</i>              |                          | (Schneider et al., 2009)        |
| <i>Isometroides vescus</i> (2n=12)          |                          | (Schneider et al., 2009)        |
| <i>Isometrus maculatus</i> (2n=14)          |                          | (Schneider et al., 2009)        |
| <i>Isometrus melanodactylus</i> (2n=14)     |                          | (Schneider et al., 2009)        |
| <i>Lychas marmoreus</i> (2n=12-15)          | Bark scorpion            | (Schneider et al., 2009)        |
| <i>Lychas variatus</i> (2n=14)              | Marbled scorpion         | (Schneider et al., 2009)        |
| <i>Lychas alexandrines</i> (2n=14)          |                          | (Shanahan, 1989)                |
| <i>Mesobuthus tamulus</i>                   | Eastern India scorpion   | (Schneider et al., 2009)        |
| <i>Tityus bahiensis</i>                     | Brazilian black scorpion | (Schneider et al., 2009)        |
| <i>Ananteris balzani</i>                    | Spotted scorpion         | (Schneider et al., 2009)        |
| <i>Mesobuthus martensii</i>                 | Manchurian scorpion      | (Schneider et al., 2009)        |
| <i>Rhopalurus rochai</i>                    |                          | (Schneider et al., 2009)        |
| <i>Tityus mattogrossensis</i>               |                          | (Schneider et al., 2009)        |
| <i>Tityus neglectus</i>                     |                          | (Schneider et al., 2009)        |
| <i>Tityus serrulatus</i>                    |                          | (Schneider et al., 2009)        |
| <i>Tityus stigmurus</i>                     |                          | (Schneider et al., 2009)        |
| <i>Tityus trivittatus</i>                   |                          | (Schneider et al., 2009)        |
| <b>Spider (primitive 6-eyed spider)</b>     |                          |                                 |
| <i>Ariadna boesenbergii</i> (2n=9-10)       |                          | (Benavente and Wettstein, 1980) |
| <i>Ariadna mollis</i> (2n=9-10)             |                          | (Díaz and Sáez, 1966)           |
| <i>Dysdera crocata</i> (2n=11-12)           | Woodlouse spider         | (Benavente and Wettstein, 1980) |
| <i>Segestria florentina</i>                 | Tube-web spider          | (Benavente and Wettstein, 1980) |
| <b>Eukoenenia (primitive Arachnids)</b>     |                          |                                 |
| <i>Eukoenenia spelaea</i> (2n=18)           |                          | (Král et al., 2007)             |
| <i>Eukoenenia mirabilis</i> (2n=14)         |                          | (Král et al., 2007)             |
| <b>Myriapoda</b>                            |                          |                                 |
| <i>Esastigmatobius longitarsis</i> (2n=20)  |                          | (Ogawa, 1953)                   |
| <i>Thereunema hilgendorfi</i> (2n=36)       |                          | (Ogawa, 1953)                   |
| <i>Thereuopoda clunifera</i> (2n=36)        |                          | (Ogawa, 1953)                   |
| <b>Tick/Mite</b>                            |                          |                                 |
| <i>Rhipicephalus microplus</i> (2n=22)      | Cattle tick              | (Hill et al., 2009)             |
| <b>Prostigmata</b>                          |                          |                                 |
| <i>Tetranychus urticae</i>                  | Two-spotted spider mite  | (Oliver Jr, 1977)               |
| <i>Eylais setosa</i>                        | Water mite               | (Oliver Jr, 1972)               |
| <i>Hydrodroma descipiens</i>                | Water mite               | (Oliver Jr, 1972)               |
| <i>Siteroptes graminum</i>                  | Grass mite               | (Cooper, 1972)                  |
| <i>Ophionyssus natricis</i> (2n=18)         |                          | (Oliver Jr, 1972)               |
| <i>Ornithonyssus sylviarum</i> (2n=18)      |                          | (Oliver Jr, 1972)               |
| <i>Bdellonyssus bacoti</i> (2n=16)          |                          | (Oliver Jr, 1972)               |
| <i>Demodex folliculorum</i>                 |                          | (Desch, 1984)                   |
| <i>Histiostoma feroniarum</i>               |                          | (Heinemann and Hughes, 1969)    |
| <i>Caloglyphus mycophagus</i>               |                          | (Heinemann and Hughes, 1970)    |
| <i>Haemaphysalis kitaokai</i> (2n=19-20)    | Tick                     | (Oliver Jr et al., 1974)        |
| <i>Haemaphysalis hystricis</i> (2n=19-20)   | Tick                     | (Oliver Jr et al., 1974)        |
| <i>Haemaphysalis formosensis</i> (2n=21-22) | Tick                     | (Oliver Jr et al., 1974)        |
| <i>Haemaphysalis bispinosa</i> (2n=21-22)   | Tick                     | (Oliver Jr et al., 1974)        |
| <i>Haemaphysalis campanulata</i> (2n=21-22) | Tick                     | (Oliver Jr et al., 1974)        |

| Scientific name                             | Common name | Reference                |
|---------------------------------------------|-------------|--------------------------|
| <i>Haemaphysalis flava</i> (2n=21-22)       | Tick        | (Oliver Jr et al., 1974) |
| <i>Haemaphysalis megaspinosa</i> (2n=21-22) | Tick        | (Oliver Jr et al., 1974) |
| <i>Haemaphysalis japonica</i> (2n=21-22)    | Tick        | (Oliver Jr et al., 1974) |
| <i>Haemaphysalis pentalagi</i> (2n=21-22)   | Tick        | (Oliver Jr et al., 1974) |

### Round worms (Rabditia, Meloidogyne, Ascaridoidea, Sprongylidia)

|                                             |                    |                                   |
|---------------------------------------------|--------------------|-----------------------------------|
| <i>Caenorhabditis elegans</i> (2n=4)        | The Worm           | (Albertson and Thomson, 1982)     |
| <i>Caenorhabditis briggsae</i>              | The Worm's cousin  | (Coghlan, 2005)                   |
| <i>Parascaris univalens</i> (2n=2[meiosis]) |                    | (Goday et al., 1985)              |
| <i>Parascaris equorum</i>                   |                    | (Goday et al., 1985)              |
| <i>Meloidogyne hapla</i> (2n=30-34)         | Root-knot nematode | (Triantaphyllou, 1966)            |
| <i>Meloidogyne arenaria</i> (2n=36-54)      | Root-knot nematode | (Triantaphyllou, 1963)            |
| <i>Meloidogyne javanica</i> (2n=43-48)      | Root-knot nematode | (Triantaphyllou, 1962)            |
| <i>Strongyloides ramsoni</i> (2n=4)         | Thread worm        | (Triantaphyllou and Moncol, 1977) |
| <i>Strongyloides papillosus</i> (2n=4)      | Thread worm        | (Triantaphyllou and Moncol, 1977) |
| <i>Camallanus baylisi</i> (2n=9-10)         |                    | (Goswami, 1974)                   |
| <i>Ascaridia dissimilis</i> (2n=9-10)       |                    | (Mutafova and Komandarev, 1976)   |
| <i>Ascaridia galli</i> (2n=9-10)            |                    | (Mutafova and Komandarev, 1976)   |
| <i>Ascaris megalocephala</i> (2n=2-38)      |                    | (Schraeder, 1935)                 |
| <i>Parascaris univalens</i>                 |                    | (Goday and Pimpinelli, 1986)      |
| <i>Parascaris equorum</i>                   | Horse threadworm   | (Lin, 1953)                       |
| <i>Onchocerca volvulus</i> (2n=8)           |                    | (Hirai et al., 1987)              |
| <i>Brugia pahangi</i> (2n=10)               | Filarial parasite  | (Sakaguchi et al., 1983)          |
| <i>Brugia malayi</i> (2n=10)                | Filarial parasite  | (Sakaguchi et al., 1983)          |

## References

- ALBERTSON, D. G. & THOMSON, J. N. 1982. The kinetochores of *Caenorhabditis elegans*. *Chromosoma*, 86, 409-428.
- ANGUS, R. B., KEMENY, C. K. & WOOD, E. L. 2004. The C-banded karyotypes of the four British species of *Notonecta* L. (Heteroptera: Notonectidae). *Hereditas*, 140, 134-138.
- BATTAGLIA, E. 1954. Assenza di centromero localizzato in *Heleocharis uniglumis* (Link) Schult (Italian). *Caryologia*, 6, 319-332.
- BAYREUTHER, K. 1955. Holokinetische Chromosomen bei *Haematopinus suis* (Anoplura, Haematopinidae). *Chromosoma*, 7, 260-270.
- BELLONCIK, S., PETCHARAWAN, O., COUILLARD, M., CHARPENTIER, G., LARUE, B., GUARDADO, H., CHAREONSAK, S. & IMANISHI, S. 2007. Development and characterization of a continuous cell line, AFKM-On-H, from hemocytes of the European corn borer *Ostrinia nubilalis* (Hübner) (Lepidoptera, Pyralidae). *In Vitro Cell. Dev. Biol. - Animal*, 43, 245-254.
- BENAVENTE, R. & WETTSTEIN, R. 1980. Ultrastructural characterization of the sex chromosomes during spermatogenesis of spiders having holocentric chromosomes and a long diffuse stage. *Chromosoma*, 77, 69-81.
- BIEMAN, C. F. M. D. 1988. Karyotypic variation in bisexual species and pseudogamous forms of the planthopper genus *Ribautodelphax* (Homoptera, Delphacidae). *Genetica*, 76, 101-110.
- BIZZARO, D., BARBOLINI, E., MANDRIOLI, M., MAZZONI, E. & MANICARDI, G. C. 1999. Cytogenetic characterization of the holocentric chromosomes in the aphids *Myzus varians* and *Myzus cerasi*. *Caryologia*, 52, 81-85.
- BLACKMAN, R. L. 1985. Spermatogenesis in the aphid *Amphorophora tuberculata* (Homoptera, Aphididae). *Chromosoma*, 92, 357-362.
- BLACKMAN, R. L., BROWN, P. A., RAMÍREZ, C. C. & NIEMEYER, H. M. 2003. Karyotype variation in the South American aphid genus *Neuquenaphis* (Hemiptera, Aphididae, Neuquenaphidinae). *Hereditas*, 138, 6-10.
- BRESSA, M., PAPESCHI, A., MOLA, L. & LARRAMENDY, M. 1999. Meiotic Studies in *Dysdercus Guérin Méneville 1831* (Heteroptera: Pyrrhocoridae). I. Neo-XY in *Dysdercus Albofasciatus* Berg 1878, a New Sex Chromosome Determining System in Heteroptera. *Chromosome Research*, 7, 503-508.
- BRESSA, M. J., FUMAGALLI, E., ITUARTE, S., FRASSA, M. V. & LARRAMENDY, M. L. 2002. Meiotic studies in *Dysdercus Guérin Méneville, 1831* (Heteroptera: Pyrrhocoridae). II. Evidence on variations of the diffuse stage between wild and laboratory-inbred populations of *Dysdercus chaquensis* Freiberg, 1948. *Hereditas*, 137, 125-131.
- BRESSA, M. J., PAPESCHI, A. G., FUMAGALLI, E., VAN DOESBURG, P. H. & LARRAMENDY, M. L. 2003. Cytogenetic and nucleolar meiotic cycle analyses in *Dysdercus imitator* Blote, 1931 (Pyrrhocoridae, Heteroptera) from Argentina. *Folia Biol (Krakow)*, 51, 135-41.
- BROWN, R. C. & LEMMON, B. E. 2000. The cytoskeleton and polarization during pollen development in *Carex blanda* (Cyperaceae). *Am. J. Bot.*, 87, 1-11.
- BROWN, S. W. & CLEVELAND, C. 1968. Meiosis in the male of *Puto albicans* (Coccoidea-Homoptera). *Chromosoma*, 24, 210-232.
- CAMACHO, J. P. M., BELDA, J. & CABRERO, J. 1985. Meiotic behaviour of the holocentric chromosomes of *Nezara viridula* (Insecta, Heteroptera) analysed by C-banding and silver impregnation. *Can. J. Genet. Cytol.*, 27, 490-497.
- CASTANHOLE, M. M. U., PEREIRA, L. L. V., SOUZA, H. V., BICUDO, H. E. M. C., COSTA, L. A. A. & ITOYAMA, M. M. 2008. Heteropicnotic chromatin and nucleolar activity in meiosis and spermiogenesis of *Limnogonus aduncus* (Heteroptera, Gerridae): a stained nucleolar organizing region that can serve as a model for studying chromosome behavior. *Genet. Mol. Res.*, 7, 1398-1407.

- CATTANI, M. V. & PAPESCHI, A. G. 2004. Nucleolus organizing regions and semi-persistent nucleolus during meiosis in *Spartocera fusca* (Thunberg) (Coreidae, Heteroptera). *Hereditas*, 140, 105-111.
- COGHLAN, A. 2005. Nematode genome evolution. *WormBook*, 1-15.
- COLLET, C. & WESTERMAN, M. 1984. Interspersed distribution patterns of C-bands and satellite DNA in the holocentric chromosomes of *Luzula flaccida* (Juncaceae). *Genetica*, 63, 175-179.
- COOK, L. G. 2000. Extraordinary and extensive karyotypic variation: A 48-fold range in chromosome number in the gall-inducing scale insect *Apiomorpha* (Hemiptera: Coccoidea: Eriococcidae). *Genome*, 43, 255-263.
- COOPER, R. S. 1972. Experimental demonstration of holokinetic chromosomes and of differential "radiosensitivity" during oogenesis in the grass mite, *Siteroptes graminum* (Reuter). *Journal of Experimental Zoology*, 182, 69-94.
- COSTA, L. C. D., AZEREDO-OLIVEIRA, M. T. V. D. & TARTAROTTI, E. 2008. Spermatogenesis and nucleolar activity in *Triatoma klugi* (triatomine, Heteroptera). *Genetics and Molecular Biology*, 31, 438-444.
- CRINITI, A., SIMONAZZI, G., CASSANELLI, S., FERRARI, M., BIZZARO, D. & MANICARDI, G. C. 2005. X-linked heterochromatin distribution in the holocentric chromosomes of the green apple aphid *Aphis pomi*. *Genetica*, 124, 93-98.
- CROSSA, R. P., HERNÁNDEZ, M., CARACCIO, M. N., ROSE, V., VALENTE, S. A. S., VALENTE, V. D. C., MEJÍA, J. M., ANGULO, V. M., RAMÍREZ, C. M. S., ROLDÁN, J., VARGAS, F., WOLFF, M. & PANZERA, F. 2002. Chromosomal evolution trends of the genus *Panstrongylus* (Hemiptera, Reduviidae), vectors of Chagas disease. *Infection, Genetics and Evolution*, 2, 47-56.
- D'ALENÇON, E., PIFFANELLI, P., VOLKOFF, A.-N., SABAU, X., GIMENEZ, S., ROCHER, J., CÉRUTTI, P. & FOURNIER, P. 2004. A genomic BAC library and a new BAC-GFP vector to study the holocentric pest *Spodoptera frugiperda*. *Insect Biochemistry and Molecular Biology*, 34, 331-341.
- DESCH, C. E. 1984. The reproductive anatomy of *Demodex folliculorum* (Simon). *Acarology VI* (Griffiths and Bowman, eds.) Ellis Horwood Ltd. Chichester, U.K., 1, 464-469.
- DÍAZ, M. & SÁEZ, F. A. 1966. Karyotypes of South-American Araneida. *Mem. Inst. Butantan Symp. Intern.*, 33, 153-154.
- DUTT, M. 1955. Chromosome structure and meiosis in a pentatomid bug. *Cellular and Molecular Life Sciences*, 11, 223-224.
- EMMEL, T. C. & TREW, H. E. 1973. The chromosomes of Skipper butterflies from southern North America (Lepidoptera, Hesperridae). *Cytologia*, 38, 45-53.
- ENNIS, T. J. & SOHI, S. S. 1976. Chromosomal characterisation of five lepidopteran cell lines of *Malacosoma disstria* (Lasiocampidae) and *Christoneura fumiferana* (Tortricidae). *Can. J. Genet. Cytol.*, 18, 471-477.
- FONTANA, P. G. 1976. Improved resolution of the meiotic chromosomes in both sexes of *Euxoa* species and their hybrids (Lepidoptera: noctuidae). *Can. J. Genet. Cytol.*, 18, 537-544.
- FUKOVÁ, I., NGUYEN, P. & MAREC, F. 2005. Codling moth cytogenetics: karyotype, chromosomal location of rDNA, and molecular differentiation of sex chromosomes. *Genome*, 48, 1083-1092.
- GALLI, E. & MANICARDI, G. C. 1998. Cytogenetic analysis on the gall generation of two aphids species: *Tetraneura nigriabdominalis* and *Tetraneura ulmi*. *Caryologia*, 51, 235-243.
- GARCÍA, M. A. 2001. A new western Mediterranean species of *Cuscuta* (Convolvulaceae) confirms the presence of holocentric chromosomes in subgenus *Cuscuta*. *Botanical Journal of the Linnean Society*, 135, 169-178.
- GEITLER, L. 1937. Die Analyse des Kernbaus und der Kernteilung der Wasserläufer *Gerris lateralis* und *Gerris lacustris* (Hemiptera heteroptera) und die Somadifferenzierung. *Cell and Tissue Research*, 26, 641-672.

- GILES, E. T. & WEBB, G. C. 1972. THE SYSTEMATICS AND KARYOTYPE OF *LABIDURA TRUNCATA* KIRBY, 1903 (DERMAPTERA: LABIDURIDAE). *Australian Journal of Entomology*, 11, 253-256.
- GODAY, C., CIOFI-LUZZATTO, A. & PIMPINELLI, S. 1985. Centromere ultrastructure in germ-line chromosomes of *Parascaris*. *Chromosoma*, 91, 121-125.
- GODAY, C. & PIMPINELLI, S. 1986. Cytological analysis of chromosomes in the two species *Parascaris univalens* and *P. equorum*. *Chromosoma*, 94, 1-10.
- GODWARD, M. B. E. 1954. Irradiation of *Spirogyra* chromosomes. *Heredity*, 8, 293.
- GOLUB, N. & NOKKALA, S. 2004. Chromosome numbers of two sucking louse species (Insecta, Phthiraptera, Anoplura). *Hereditas*, 141, 94-96.
- GOLUB, N. V. & KUČEROVÁ, Z. 2008. Karyotype and reproductive organs of male *Dorypteryx domestica* (Smithers, 1958) (Psocoptera: Trogiomorpha: Psyllipsocidae). *Folia biologica (Kraków)*, 56, 21-23.
- GOLUB, N. V., NOKKALA, S. & KUZNETSOVA, V. G. 2004. Holocentric chromosomes of Psocids (Insecta, Psocoptera) analysed by C-banding, silver impregnation and sequence specific fluorochromes CMA<sub>3</sub> and DAPI. *Folia biologica (Kraków)*, 53, 143-149.
- GOSWAMI, U. 1974. An unequal pair of chromosomes in *Camallanus baylisi* (Nematoda). *Cytologia*, 39, 321-325.
- GROZEVA, S., KUZNETSOVA, V. G. & NOKKALA, S. 2004. Patterns of chromosome banding in four nabid species (Heteroptera, Cimicopmorpha, Nabidae) with high chromosome number karyotypes. *Hereditas*, 140, 99-104.
- GROZEVA, S., NOKKALA, S. & SIMOV, N. 2006. First evidence of sex chromosome pre-reduction in male meiosis in the Miridae bugs (Heteroptera). *Folia biologica (Kraków)*, 54, 9-12.
- GUERRA, M. & GARCÍA, M. A. 2004. Heterochromatin and rDNA sites distribution in the holocentric chromosomes of *Cuscuta approximata* Bab. (Convolvulaceae). *Genome*, 47, 134-140.
- HÅKANSSON, A. 1954. Meiosis and pollen in X-rayed and untreated spikelets of *Eleocharis palustris*. *Hereditas*, 40, 325-345.
- HÅKANSSON, A. 1958. Holocentric chromosomes in *Eleocharis*. *Hereditas*, 44, 531-540.
- HALES, D. F. 1989. The chromosomes of *Schoutedenia lutea* (Homoptera, Aphidoidea, Greenideinae), with an account of meiosis in the male. *Chromosoma*, 98, 295-300.
- HALKA, O. 1965. X-ray-induced changes in the chromosomes of *Limnotettix* (Homoptera). *Chromosoma*, 16, 185-191.
- HEILBORN, O. 1924. Chromosome numbers and dimensions, species-formation and phylogeny in the genus *Carex*. *Hereditas*, 5, 129-216.
- HEINEMANN, R. L. & HUGHES, R. D. 1969. The cytological basis for reproductive variability in the Anoetidae (Sarcoptiformes: Acari). *Chromosoma*, 28, 346-356.
- HEINEMANN, R. L. & HUGHES, R. D. 1970. Reproduction, reproductive organs, and meiosis in the bisexual nonparthenogenic mite *Caloglyphus mycophagus*, with reference to oocyte degeneration in virgins (Sarcoptiformes: Acaridae). *J. Morphol.*, 130, 93-102.
- HEIZER, P. 1950. The chromosome cytology of two species of the pacific genus *Oechalia* (pentatomidae, hemiptera-heteroptera), *Oechalia patruelis* stal, and *Oechalia pacifica* stal. *Journal of Morphology*, 87, 179-226.
- HILL, C., GUERRERO, F., VAN ZEE, J., GERACI, N., WALLING, J. & STUART, J. 2009. The position of repetitive DNA sequence in the southern cattle tick genome permits chromosome identification. *Chromosome Research*, 17, 77-89.
- HIRAI, H., TADA, I., TAKAHASHI, H., NWOKE, B. E. B. & UFOMADU, G. O. 1987. Chromosomes of *Onchocerca volvulus* (Spirurida: Onchocercidae): a comparative study between Nigeria and Guatemala. *J. Helminthology*, 61, 43-46.

- HOF, A. E. V. T., MAREC, F., SACCHERI, I. J., BRAKEFIELD, P. M. & ZWAAN, B. J. 2008. Cytogenetic characterization and AFLP-based genetic linkage mapping for the butterfly *Bicyclus anynana*, covering all 28 karyotypes chromosomes. *PLoS ONE*, 3, e3882.
- HOSHINO, T. 1987. Karyomorphological studies on 6 taxa of *Eleocharis* in Japan. *The bulletin of the Okayama University of Science*, 22, 305-303.
- HUGHES-SCHRADER, S. 1955. The chromosomes of the giant scale *Aspidoproctus maximus* louns. (*Coccoidea-Margarodidae*) with special reference to asynapsis and sperm formation. *Chromosoma*, 7, 420-438.
- HUGHES-SCHRADER, S. & RIS, H. 1941. The diffuse spindle attachment of coccids, verified by the mitotic behavior of induced chromosome fragments. *Journal of Experimental Zoology*, 87, 429-456.
- HUGHES-SCHRADER, S. & SCHRADER, F. 1961. The kinetochore of the hemiptera. *Chromosoma*, 12, 327-350.
- IMANISHI, S., INOUE, H., KAWARABATA, T., HARA, K., FUNAKOSHI, M., YASUNAGA-AOKI, C. & MITSUDA, K. 2003. Establishment and characterization of a continuous cell line from pupal ovaries of Japanese oak silkworm *Antheraea yamamai* Guerin-Meneville. *In Vitro Cell. Dev. Biol. - Animal*, 39, 1-3.
- ITUARTE, S. & PAPESCHI, A. G. 2004. Achiasmatic Male Meiosis in *Tenagobia* (*Fuscagobia*) *fuscata* (Stål) (*Heteroptera, Corixoidea, Micronectidae*). *Genetica*, 122, 199-206.
- JACOBS, D. H. 2004. The evolution of a neo-XY1Y2 sex chromosome system by autosome-sex chromosome fusion in *Dundocoris nodulicarinus* Jacobs (*Heteroptera: Aradidae: Carventinae*). *Chromosome Research*, 12, 175-191.
- JAROLÍMOVÁ, V. & KIRSCHNER, J. 1995. Tetraploids in *Luzula multiflora* (*Juncaceae*) in Ireland: karyology and meiotic behaviour. *Folia Geobot. Phytotax., Praha*, 30, 389-396.
- JOHN, B. & CLARIDGE, M. F. 1974. Chromosome variation in British populations of *Oncopsis* (*Hemiptera: Cicadellidae*). *Chromosoma*, 46, 77-89.
- JOSTES, R. F. J. 1975. A method for determining the chromosome numbers of parthogenetic Psocids (*Insecta: Psocoptera*). *Cytologia*, 40, 553-555.
- KAGEYAMA, D. & TRAUT, W. 2003. Opposite sex-specific effects of *Wolbachia* and interference with the sex determination of its host *Ostrinia scapularis*. *Proc. R. Soc. Lond. B*, 271, 251-258.
- KIAUTA, B. 1969. Sex chromosomes and sex determining mechanisms in Odonata, with a review of the cytological conditions in the family Gomphidae, and references to the karyotypic evolution in the order. *Genetica*, 40, 127-157.
- KIAUTA, B. & MOL, A. W. M. 1977. Behaviour of the spermatocyte chromosomes of the mayfly, *Cloeon dipterum* (Linnaeus, 1761) s.1. (*Ephemeroptera: Baetidae*), with a note on the cytology of the order. *Genen Phaenen*, 19, 31-39.
- KING, G. C. 1953. 'Diffuse' centromere, and other cytological observations on two desmids. *Nature*, 171, 181.
- KRÁL, J., KOVÁČ, L. U., ŠT'ÁHLAVKÝ, F., LONSKÝ, P. & L'UPTÁČIK, P. 2007. The first karyotype study in palpigrades, a primitive order of arachnids (*Arachnida: Palpigradi*). *Genetica*, 134, 79-87.
- KUTA, E., BOHANEK, B., DUBAS, E., VIŽINTIN, L. & PRZYWARA, L. 2004. Chromosome and nuclear DNA study on *Luzula* - a genus with holokinetic chromosomes. *Genome*, 47, 246-236.
- KUZNETSOVA, V. G. 1988. Unusual mechanism of chromosome sex determination in cotton lace bug *Dysdercus supersticiosus* F. (*Pyrrhocoridae, Heteroptera*). *Doklady Akademii nauk SSR (Russian)*, 301, 456-458.
- KUZNETSOVA, V. G., GROZEVA, S., SEWLAL, J.-A. N. & NOKKALA, S. 2007. Cytogenetic characterization of the Trinidad endemic, *Arachnocoris trinitatus* Bergroth: the first data for the tribe Arachnocorini (*Heteroptera: Cimicomorpha: Nabidae*). *Folia biologica (Kraków)*, 55, 17-26.



- KUZNETSOVA, V. G., MARYAŃSKA-NADACHOWSKA, A. & NOKKALA, S. 2003. A new approach to the auchenorrhyncha (Hemiptera, Insecta) cytogenetics: chromosomes of the meadow spittlebug *Philaenus spumarius* (L.) examined using various chromosome banding techniques. *Folia biologica* (Kraków), 51, 33-40.
- KUZNETSOVA, V. G., NADACHOWSKA, A. M. & ABDUL-NOUR, H. 2008. A chromosomal study on a Lebanese spittlebug *Philaenus arslani* (Hemiptera: Auchenorrhyncha: Aphrophoridae). *Eur. J. Entomol.*, 105, 205-210.
- KUZNETSOVA, V. G., NOKKALA, S. & SHCHERBAKOV, D. E. 2002. Karyotype, reproductive organs, and pattern of gametogenesis in *Zorotypus hubbardi* Caudell (Insecta: Zoraptera, Zorotypidae), with discussion on relationship of the order. *Can. J. Genet. Cytol.*, 80, 1047-1054.
- LABINA, E. S., MARYAŃSKA-NADACHOWSKA, A. & KUZNETSOVA, V. G. 2007. Meiotic karyotypes in males of nineteen species of Psylloidea (Hemiptera) in the families Psyllidae and Triozidae. *Folia biologica* (Kraków), 55, 27-34.
- LANZONE, C. & SOUZA, M. J. D. 2006. Chromosome complement and meiosis in three species of the Neotropical bug genus *Antiteuchus* (Heteroptera, Pentatomidae, Discocephalinae). *Genetics and Molecular Biology*, 29, 49-55.
- LAWSON, C. A. 1936. A chromosome study of the aphid *Macrosiphum solanifolii*. *Biol Bull*, 70, 288-307.
- LEFEVRE, G. & MCGILL, C. 1908. The chromosomes of *Anasa tristis* and *Anax junius*. *American Journal of Anatomy*, 7, 469-487.
- LIN, T. P. 1953. The chromosomal cycle in *Parascaris equorum* (*Ascaris megalcephala*): Oogenesis and diminution. *Chromosoma*, 6, 175-198.
- LUCEÑO, M., VANZELA, A. L. & GUERRA, M. 1998. Cytotaxonomic studies in Brazilian *Rhynchospora* (Cyperaceae), a genus exhibiting holocentric chromosomes. *Can. J. Bot.*, 76, 440-449.
- LUKHTANOV, V. A. & DANTCHENKO, A. D. 2002. Principles of the highly ordered arrangement of metaphase I bivalents in spermatocytes of *Agrodiaetus* (Insecta, Lepidoptera). *Chromosome Research*, 10, 5-20.
- MADEJ, A. 1998. Spindle microtubules and chromosome behavior in mitosis of *Luzula luzuloides*, a species with holokinetetic chromosomes. *Acta Biologica Cracoviensia / Botanica*, 40, 61-67.
- MANDRIOLI, M. 2002. Cytogenetic characterization of telomeres in the holocentric chromosomes of the lepidopteran *Mamestra brassicae*. *Chromosome Research*, 10, 279-286.
- MANDRIOLI, M., AZZONI, P., LOMBARDO, G. & MANICARDI, G. C. 2011. Composition and epigenetic markers of heterochromatin in aphid *Aphis nerii* (Hemiptera: Aphididae). *Cytogenet Genome Res.*
- MANICARDI, G. C., BIZZARO, D., AZZONI, P. & BIANCHI, U. 1994. Cytological and electrophoretic analysis of DNA methylation in the holocentric chromosomes of *Megoura viciae* (Homoptera, Aphididae). *Genome*, 37, 625-630.
- MANICARDI, G. C., BIZZARO, D., MANDRIOLI, M. & BIANCHI, U. 1998. Silver staining as a new banding technique to identify aphid chromosomes. *Chromosome Research*, 6, 55-57.
- MARYAŃSKA-NADACHOWSKA, A. & GŁOWACKA, E. 2005. Meiotic karyotypes and structure of testes of nineteen species of jumping-lice (Hemiptera, Psylloidea) from South Africa. *Folia biologica* (Kraków), 53, 143-148.
- MARYAŃSKA-NADACHOWSKA, A. & GROZEVA, S. 2001. Chromosome banding in *Cacopsylla mali* (Schmidberger) and *Cacopsylla sorbi* (Linnaeus) (Homoptera, Psyllidae) with polymorphic sex chromosomes. *Folia biologica* (Kraków), 49, 157-161.
- MARYAŃSKA-NADACHOWSKA, A., KUZNETSOVA, V. G. & NOKKALA, S. 2001. Standard and C-banded meiotic karyotypes of Psylloidea (Sternorrhyncha, Homoptera, Insecta). *Folia biologica* (Kraków), 49, 53-62.
- MOLA, L. M. 1995. Post-Reductional Meiosis in *Aeshna* (Aeshnidae, Odonata). *Hereditas*, 122, 47-55.

- MOLA, L. M. & PAPESCHI, A. G. 1997. *Citogenética de Dysdercus chaquensis (Heteroptera: Pyrrhocoridae)*. *Rev. Soc. Entomol. Argentina*, 56, 20.
- MURAKAMI, A. & IMAI, H. T. 1974. *Cytological evidence for holocentric chromosomes of the silkworms, Bombyx mori and B. mandarina, (Bombycidae, Lepidoptera)*. *Chromosoma*, 47, 167-178.
- MUTAFOVA, T. & KOMANDAREV, S. 1976. *On the karyotype of a laboratory Trichinella strain from Bulgaria*. *Parasitology Research*, 48, 247-250.
- NOKKALA, S. & GOLUB, N. V. 2002. *Cytogenetics of three parthenogenetic Psocid species (Psocoptera, Psocomorpha)*. *Hereditas*, 137, 198-201.
- NOKKALA, S. & GOLUB, N. V. 2006. *Automictic and apomictic parthogenesis in Psocids (Insecta: Psocoptera)*. *Folia biologica (Kraków)*, 54, 19-22.
- NOKKALA, S., GROZEVA, S., KUZNETSOVA, V. G. & MARYAŃSKA-NADACHOWSKA, A. 2003. *The origin of the achiasmatic XY sex chromosome system in Cacopsylla peregrina (Frst.) (Psylloidea, Homoptera)*. *Genetica*, 119, 327-332.
- NOKKALA, S., KUZNETSOVA, V. G., MARYAŃSKA-NADACHOWSKA, A. & NOKKALA, C. 2004. *Holocentric chromosomes in meiosis. I. Restriction of the number of chiasmata in bivalents*. *Chromosome Research*, 12, 733-739.
- NOKKALA, S., KUZNETSOVA, V. G., MARYAŃSKA-NADACHOWSKA, A. & NOKKALA, C. 2006. *Holocentric chromosomes in meiosis. II. The modes of orientation and segregation of a trivalent*. *Chromosome Research*, 14, 559-565.
- NOKKALA, S., LAUKKANEN, A. & NOKKALA, C. 2002. *Mitotic and meiotic chromosomes in Somatochlora metallica (Cordulidae, Odonata). The absence of localized centromeres and inverted meiosis*. *Hereditas*, 136, 7-12.
- NOKKALA, S., MARYAŃSKA-NADACHOWSKA, A. & KUZNETSOVA, V. G. 2008. *First evidence of polyploidy in Psylloidea (Homoptera, Sternorrhyncha): a parthenogenetic population of Cacopsylla myrtilli (W. Wagner, 1947) from northeast Finland is apomictic and triploid*. *Genetica*, 133, 201-205.
- NOKKALA, S. & NOKKALA, C. 1997. *The absence of chiasma terminalization and inverted meiosis in males and females of Myrmus miriformis F. (Corizidae, Heteroptera)*. *Heredity*, 78, 561-566.
- NUR, U. 1968. *Endomitosis in the mealy bug, Planococcus citri (Homoptera: Coccoidea)*. *Chromosoma*, 24, 202-209.
- NUR, U. 1970. *Translocations between eu- and heterochromatic chromosomes, and spermatocytes lacking a heterochromatic set in male mealy bugs*. *Chromosoma*, 29, 42-61.
- OGAWA, A. 1953. *Chromosome studies in the Myriapoda. V. A chromosomal survey in some chilopods with a cyto-taxonomic consideration*. *Japanese Journal of Genetics*, 23, 12-28.
- OLIVER JR, J. H. 1972. *Cytogenetics of ticks (Acari: Ixodoidea). 8. Chromosomes of six species of Egyptian Hyalomma (Ixodidae)*. *J. Parasitology*, 58, 611-613.
- OLIVER JR, J. H. 1977. *Cytogenetics of mites and ticks*. *Ann. Rev. Entomol.*, 22, 407-429.
- OLIVER JR, J. H., TANAKA, K. & SAWADA, M. 1974. *Cytogenetics of ticks (Acari: Ixodoidea). 14. Chromosomes of nine species of Asian Haemaphysalines*. *Chromosoma*, 45, 445-456.
- ORTIZ, E. 1969. *Chromosomes and meiosis in Dermaptera*. *Chromosomes Today (C.D. Darlington & K.R. Lewis, eds.)*. Vol. 2, p.33-40. *Edinburgh: Oliver & Boyd*.
- PANZERA, F., PÉREZ, R., HORNOS, S., PANZERA, Y., CESTAU, R., DELGADO, V. & NICOLINI, P. 1996. *Chromosome numbers in the Triatominae (Hemiptera-Reduviidae): a review*. *Memórias do Instituto Oswaldo Cruz*, 94, 515-518.
- PAPESCHI, A. G. 1988. *C-banding and DNA content in three species of Belostoma (Heteroptera) with large differences in chromosome size and number*. *Genetica*, 76, 43-51.
- PAZY, B. & PLITMANN, U. 1991. *Unusual chromosome separation in meiosis of Cuscuta L.* *Genome*, 34, 533-536.

- PAZY, B. & PLITMANN, U. 1994. Holocentric chromosome behaviour in *Cuscuta* (Cuscutaceae). *Plant Systematics and Evolution*, 191, 105-109.
- PEREPELOV, E., BUGROV, A. & WARCHALOWSKA-SLIWA, E. 2001. C-banded karyotypes of some dragonfly species from Russia. II. The families Cordulegasteridae, Corduliidae, and Gomphidae. *Folia biologica (Kraków)*, 49, 175-178.
- PITTENDRIGH, B. R., CLARK, J. M., JOHNSTON, J. S., LEE, S. H., ROMERO-SEVERSON, J. & DASCH, G. A. 2006. Sequencing of a new target genome: the *Pediculus humanus humanus* (Phthiraptera: Pediculidae) Genome Project. *J. Med. Entomol.*, 43, 1103-1111.
- PIZA, S. D. 1947. Cromossômios do *Dysdercus* (Hemiptera-Pyrrhocoridae). *Anais de E.S.A. "Luiz de Quieroz"* (Portugues), 4, 209-216.
- PRASAD RATH, S. & PATNAIK, S. 1977. A note on the cytology of *Fimbristylis umbellaris* (Lamk.) Vahl. *Journal of Plant Research*, 90, 79-81.
- RAY, J. H. & VENKETESWARAN, S. 1979. DNA replication, 3H-cRNA in situ hybridization and C-band patterns in the polycentric chromosomes of *Luzula purpurea* Link. *Chromosoma*, 74, 337-346.
- REGO, A. & MAREC, F. 2003. Telomeric and interstitial telomeric sequences in holokinetic chromosomes of *Lepidoptera*: telomeric DNA mediates association between postpachytene bivalents in achiasmatic meiosis of females. *Chromosome Research*, 11, 681-694.
- RIS, H. 1942. A cytological and experimental analysis of the meiotic behavior of the univalent X chromosome in bearberry aphid *Tamalia* (*Phyllaphis*) *coweni* (Ckll.). *Journal of Experimental Zoology*, 90, 267-330.
- RISHI, S. & RISHI, K. K. 1977. Elongated chromosomes in *Pieris brassicae* L. (*Lepidoptera*, *Pieridae*) after treatment with colchicine. *Cellular and Molecular Life Sciences*, 33, 609-610.
- RUFAS, J. S. & GIMÉNEZ-MARTÍN, G. 1986. Ultrastructure of the kinetochore in *Graphosoma italicum* (Hemiptera: Heteroptera). *Protoplasma*, 132, 142-148.
- RUTHMANN, A. & PERMANTIER, Y. 1973. Spindel und kinetochoren in der Mitose und Meiose der Baumwollwanze *Dysdercus intermedius* (Heteroptera). *Chromosoma*, 41, 271-288.
- SAKAGUCHI, Y., TADA, I., ASH, L. R. & AOKI, Y. 1983. Karyotypes of *Brugia pahangi* and *Brugia malayi* (Nematoda: Filarioidea). *The Journal of Parasitology*, 69, 1090-1093.
- SANDS, V. E. 1982. Cytological studies of the Coreidae and Alydidae (Hemiptera: Heteroptera). II. Karyological changes exemplified by Malaysian genera. *Caryologia*, 35, 335-345.
- SCHNEIDER, M. C., ZACARO, A. A., PINTO-DA-ROCHA, R., CANDIDO, D. M. & CELLA, D. M. 2009. A comparative cytogenetic analysis of 2 Bothriuridae species and overview of the chromosome data of scorpions. *J. Heredity*, 100, 545-555.
- SCHRADER, F. 1932. Recent hypotheses on the structure of spindles in the light of certain observations in Hemiptera. *Z. Wiss. Zool.*, 142, 520-539.
- SCHRADER, F. 1935. Notes on the mitotic behavior of long chromosomes. *Cytologia*, 6, 422-430.
- SCHRADER, F. 1941. The association of non-hologous chromosomes in *Corixidae* (Hemiptera-Heteroptera). *Proc. Roy. Soc. Edinburgh*, 58, 192-212.
- SCHRADER, F. & HUGHES-SCHRADER, S. 1956. Polyploidy and fragmentation in the chromosomal evolution of various species of *Thyanta* (Hemiptera). *Chromosoma*, 7, 469-496.
- SHANAHAN, C. M. 1989. Cytogenetics of Australian scorpions. I. Interchange polymorphism on the family Buthidae. *Genome*, 32, 8.
- SHARMA, O. P. & GUPTA, S. C. 1980. On the chromosomes of two species of jassids (Cicadellidae: Homoptera). *Cytobios*, 29, 37-41.
- SHEIKH, S. A. & KONDO, K. 1995. Differential Staining with Orcein, Giemsa, CMA, and DAPI for Comparative Chromosome Study of 12 Species of Australian *Drosera* (Droseraceae). *American Journal of Botany*, 82, 1278-1286.

- SILVA, C. R. M. D., GONZÁLEZ-ELIZONDO, M. S. & VANZELA, A. L. L. 2005. Reduction of chromosome number in *Eleocharis subarticulata* (Cyperaceae) by multiple translocations. *Botanical Journal of the Linnean Society*, 149, 457-464.
- SILVA, C. R. M. D., GONZÁLEZ-ELIZONDO, M. S. & VANZELA, A. L. L. 2008. Chromosome reduction in *Eleocharis maculosa* (Cyperaceae). *Cytogenetic and Genome Research*, 122, 175-180.
- SNOGERUP, S. 1993. A Revision of *Juncus* Subgen. *Juncus* (Juncaceae). *Willdenowia*, 23, 23-73.
- SPENCE, J. M., BLACKMAN, R. L., TESTA, J. M. & READY, P. D. 1998. A 169-base pair tandem repeat DNA marker for subtelomeric heterochromatin and chromosomal rearrangements in aphids of the *Myzus persicae* group. *Chromosome Research*, 6, 167-175.
- SQUIRE, R. D. 1973. The effects of acute gamma irradiation on the brine shrimp *Artemia*. III. Male F1 reproductive performance following paternal irradiation of mature sperm. *Bio. Bull.*, 144, 192-199.
- SRIKANTAPPA, L. & ASWATHANARAYANA, N. V. 1978. Chromosomes and meiosis in two species of *Dermoptera*. *Cytobios*, 20, 93-98.
- SUJA, J. A., DEL CERRO, A. L., PAGE, J., RUFAS, J. S. & SANTOS, J. L. 2000. Meiotic sister chromatid cohesion in holocentric sex chromosomes of three heteropteran species is maintained in absence of axial elements. *Chromosoma*, 109, 35-43.
- SUN, R.-Y. & ROBINSON, A. G. 1966. Chromosome studies on 50 species of Aphids. *Canadian Journal of Zoology*, 44, 649-653.
- TANAKA, N. & TANAKA, N. 1977. Chromosome studies in *Chionographis* (Liliaceae). I. On the holokinetic nature of chromosomes in *Chionographis japonica* Maxim. *Cytologia*, 42, 753-763.
- TANAKA, N. & TANAKA, N. 1979. Chromosome studies in *Chionographis* (Liliaceae). II. Morphological characteristics of the somatic chromosomes of four Japanese members. *Cytologia*, 44, 935-949.
- TOMBESI, M. L. & PAPASCHI, A. G. 1993. Meiosis in *Haematopinus suis* and *Menacanthus stramineus* (Phthiraptera, Insecta). *Hereditas*, 119, 31-38.
- TOMBESI, M. L., PAPESCHI, A. G. & MOLA, L. M. 1998. Spermatogenesis in *Bovicola limbata* Gervais, 1844 and *B. caprae* Gurlt, 1843 (Phthiraptera, Ischnocera). *Cytologia*, 64, 3.
- TRAUT, W. & MAREC, F. 1997. Sex Chromosome Differentiation in Some Species of *Lepidoptera* (Insecta). *Chromosome Research*, 5, 283-291.
- TRIANANTAPHYLLOU, A. C. 1962. Oogenesis in the Root-Knot Nematode *Meloidogyne Javanica*. *Nematologica*, 7, 105-113.
- TRIANANTAPHYLLOU, A. C. 1963. Polyploidy and parthenogenesis in the root-knot nematode *Meloidogyne arenaria*. *J. Morphol.*, 489-499.
- TRIANANTAPHYLLOU, A. C. 1966. Polyploidy and reproductive patterns in the root-knot nematode *Meloidogyne hapla*. *J. Morphol.*, 118, 403-414.
- TRIANANTAPHYLLOU, A. C. & MONCOL, D. J. 1977. Cytology, reproduction, and sex determination of *Strongyloides ransomi* and *S. papillosus*. *J. Parasitology*, 63, 961-973.
- UESHIMA, N. 1979. Hemiptera II: Heteroptera. *Anima Cytogenetics*, Vol. 3: Insecta 6 (B. John ed.). *Gebrüder Bornsträger, Berlin Stuttgart*. 117 pp.
- VANZELA, A. L. L. & GUERRA, M. 2000. Heterochromatin differentiation in holocentric chromosomes of *Rhynchospora* (Cyperaceae). *Genetics and Molecular Biology*, 23, 453-456.
- VANZELA, A. L. L., GUERRA, M., AND LUCEÑO, M. 1996. *Rhynchospora tenuis* Link (Cyperaceae), a species with the lowest number of holocentric chromosomes ( $n = 2$ ). *Cytobios*, 88, 219-220.
- WAHL, H. A. 1940. Chromosome numbers and meiosis in the genus *Carex*. *American Journal of Botany*, 27, 458-470.
- WALLER, M. S. & ANGUS, R. B. 2005. A chromosomal investigation of the west European species of *Corixa Geoffroy* (Heteroptera: Corixidae). *Genetica*, 125, 17-25.

- WEBB, G. C. & WHITE, M. J. D. 1970. A new interpretation of the sex determining mechanism of the European earwig, *Forficula auricularia*. *Experientia (Basel)*, 26, 1387-1389.
- WHITE, M. J. D. 1971. The chromosomes of *Hemimerus bouvieri chopard* (Dermaptera). *Chromosoma*, 34, 183-189.
- WHITE, M. J. D. 1972. The chromosomes of *Arixenia esau* Jordan (Dermaptera). *Chromosoma*, 36, 338-342.
- WOLF, K. W., NOVAK, K. & MAREC, F. 1997. Kinetic organization of metaphase I bivalents in spermatogenesis of *Lepidoptera* and *Trichoptera* species with small chromosome numbers. *Heredity*, 79, 135-143.
- WOLFE, S. L. & JOHN, B. 1965. The organization and ultrastructure of male meiotic chromosomes in *oncopeltus fasciatus*. *Chromosoma*, 17, 85-103.
